# Supplementary material for: Ru(ii)-diphosphine/N,S-mercapto complexes and their anti-melanoma properties
Source: Royal Society of Chemistry journal article supplement (doi:10.1039/d4dt02575j), 2024-11-14
Supplement: d4dt02575j1.pdf [file d4dt02575j1.pdf]

## *Supporting Information*

### **Ru(II)-Diphosphine/N,S-Mercapto Complexes and Their Anti-melanoma Properties**

Nádija N. P. da Silva<sup>a</sup>, Marcos V. Palmeira-Mello<sup>a</sup>, Nathália O. Acésio<sup>b</sup>, Carlos A. F. Moraes<sup>a</sup>, João Honorato<sup>c</sup>, Eduardo E. Castellano<sup>c</sup>, Denise C. Tavares<sup>b</sup>, Katia M. Oliveira<sup>d,\*</sup>, Alzir A. Batista<sup>a,\*</sup>

<sup>a</sup>*Departament of Chemistry, Federal University of São Carlos – UFSCar, CEP 13565-905, São Carlos - SP, Brazil.*

<sup>b</sup>*University of Franca - UNIFRAN, Avenida Dr. Armando Salles Oliveira, CP 201, Parque Universitário, CEP 14404-600, Franca, SP, Brazil.*

<sup>c</sup>*Physics Institute of São Carlos, University of São Paulo – USP, CEP 13560-970, São Carlos, SP, Brazil.*

<sup>d</sup>*Institute of Chemistry, University of Brasília - UnB – CEP 70910-900, Brasília - DF, Brazil.*

\* Corresponding authors: [katia.oliveira@unb.br](mailto:katia.oliveira@unb.br) (Katia M. Oliveira); [daab@ufscar.br](mailto:daab@ufscar.br) (Alzir A. Batista)

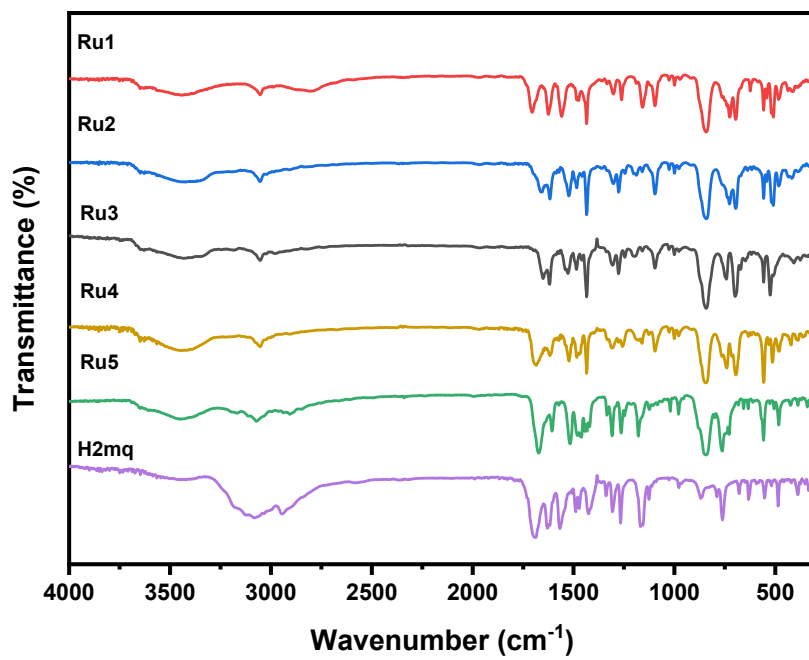

**Figure S1.** FTIR spectra of the free **H2mq** ligand and **Ru1-Ru5** complexes, in KBr pellets.

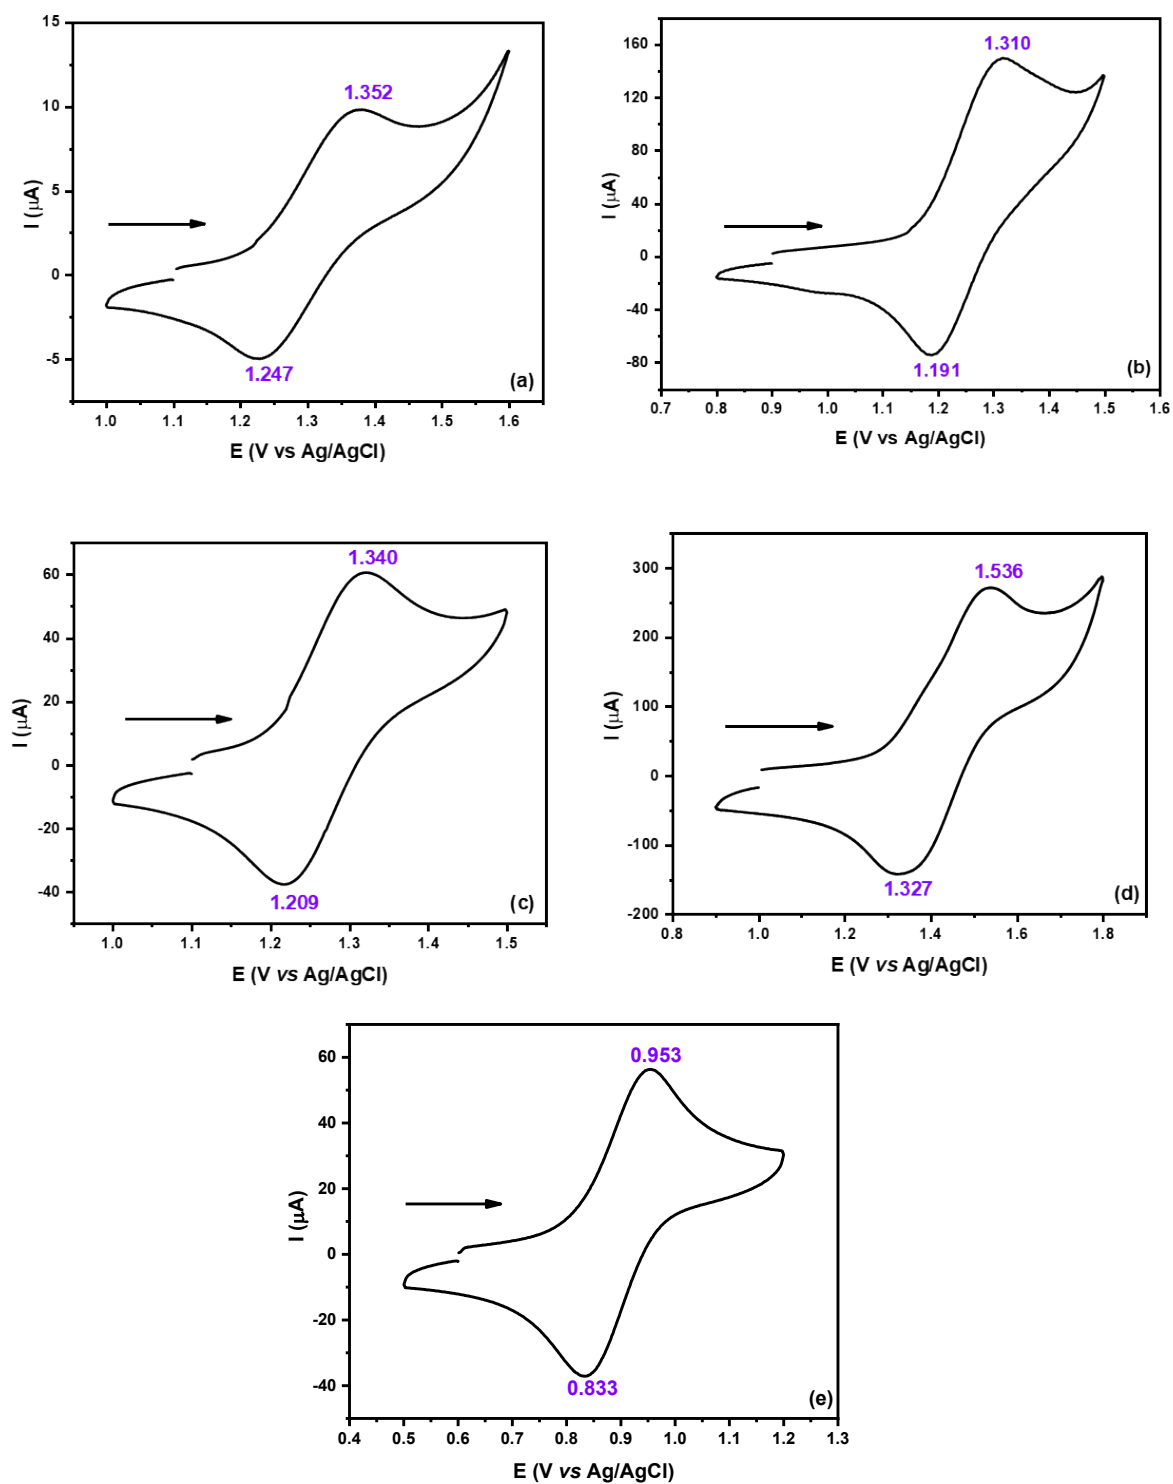

**Figure S2.** (A-E) Cyclic voltammogram (Electrolyte: 0.1 M PTBA in  $\text{CH}_2\text{Cl}_2$ ; Electrodes: Ag/AgCl, as a reference and Pt disc as work and auxiliary,  $100 \text{ mVs}^{-1}$ ) of Ru1-Ru5 complexes.

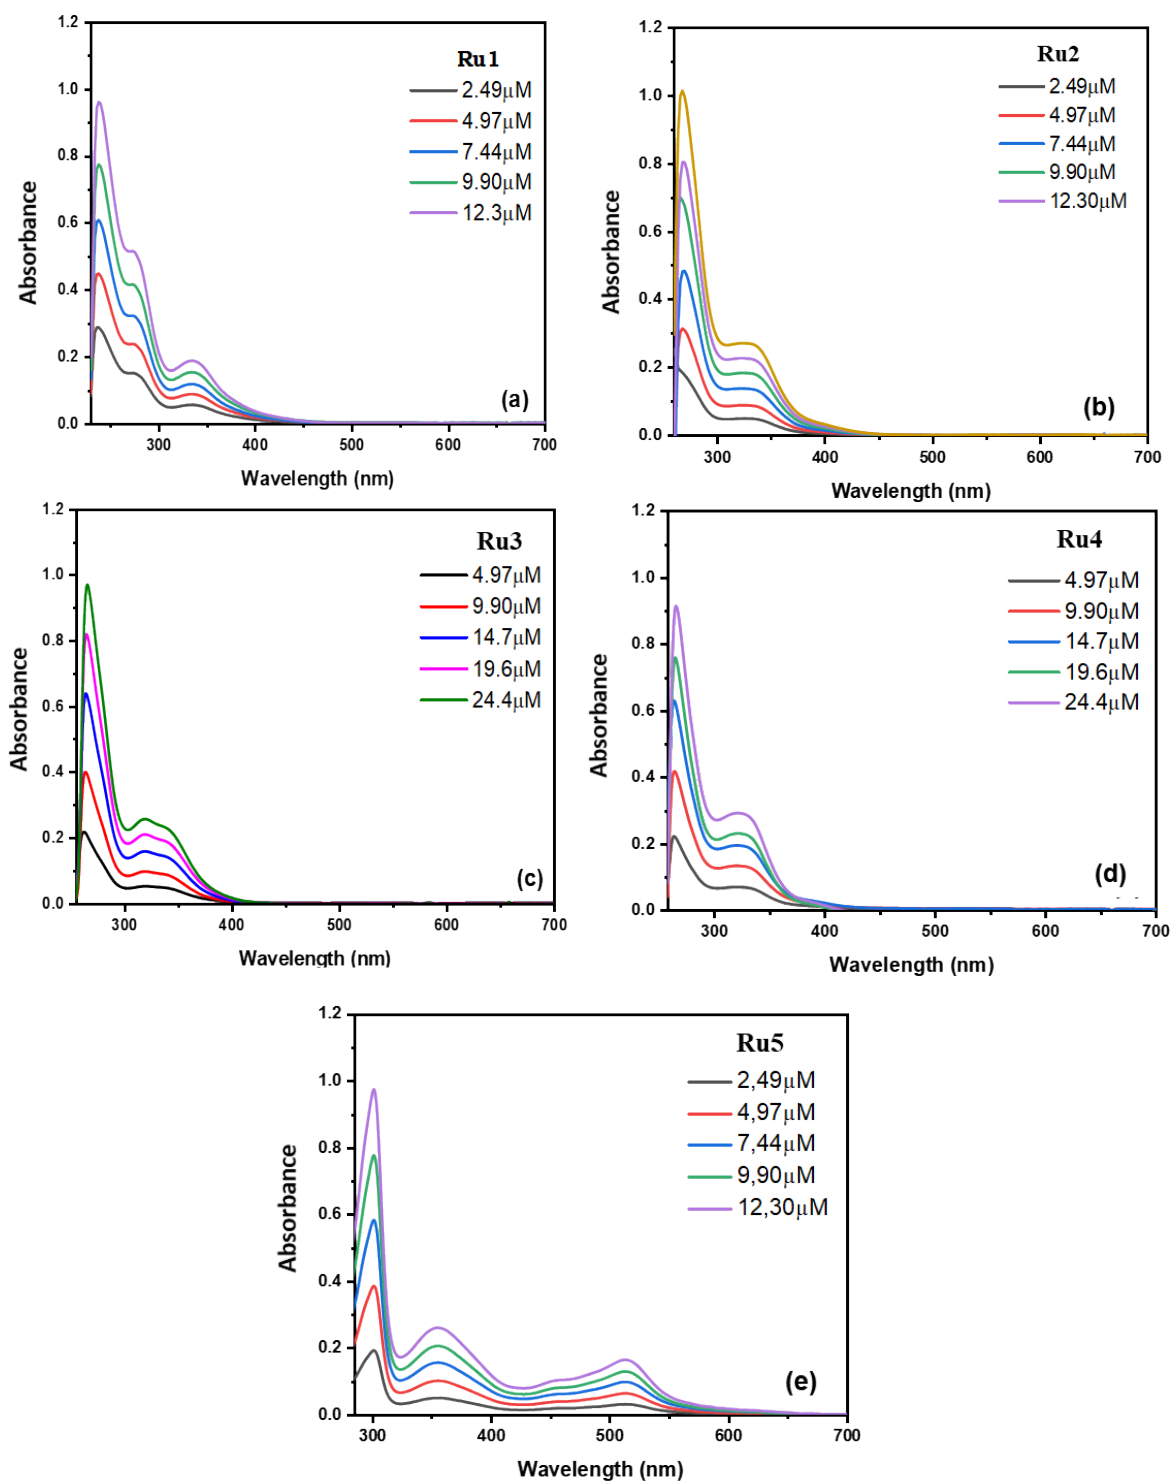

**Figure S3.** (A) UV-vis spectra of the **Ru1** complex in  $\text{CH}_2\text{Cl}_2$ . (B-E) UV-vis spectra of the **Ru2- Ru5** complex in DMSO.

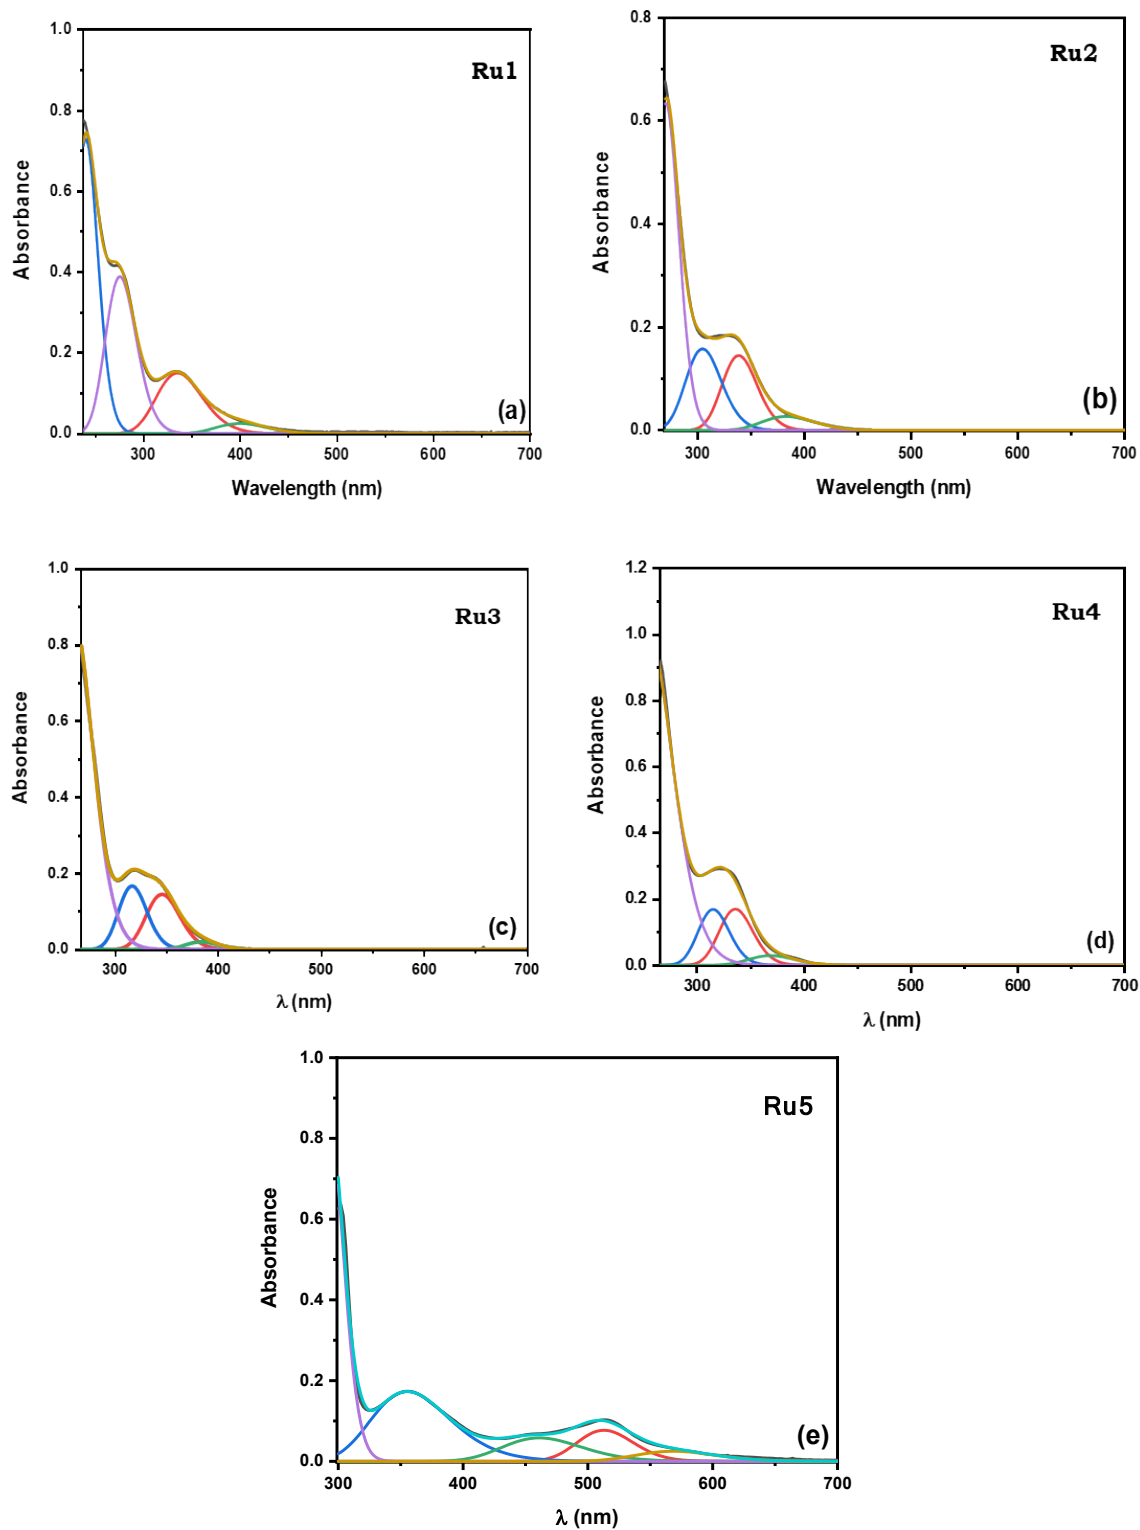

Figure S4. (A-E) Deconvolution of the electronic spectra of Ru1-Ru5 complexes.

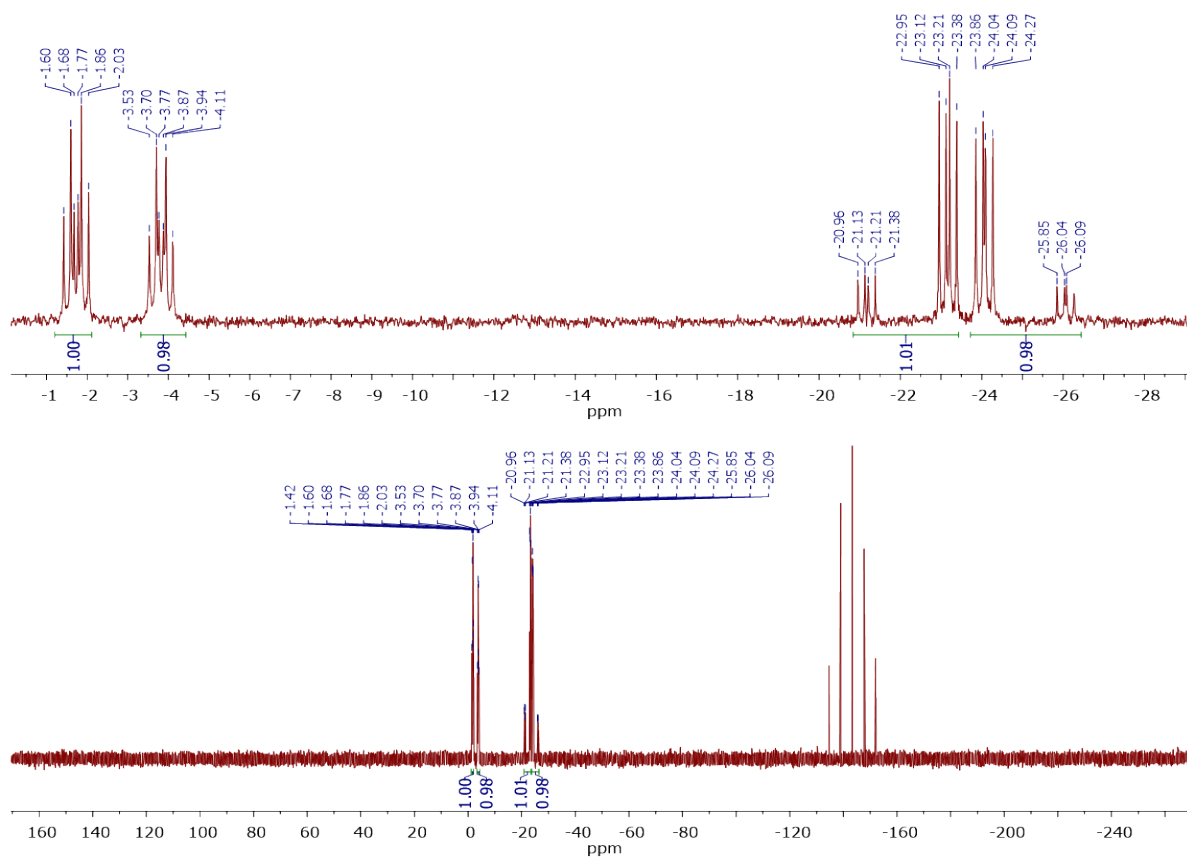

Figure S5.  $^{31}\text{P}\{^1\text{H}\}$  NMR spectrum of the **Ru1** complex in acetone/ $\text{D}_2\text{O}$ .

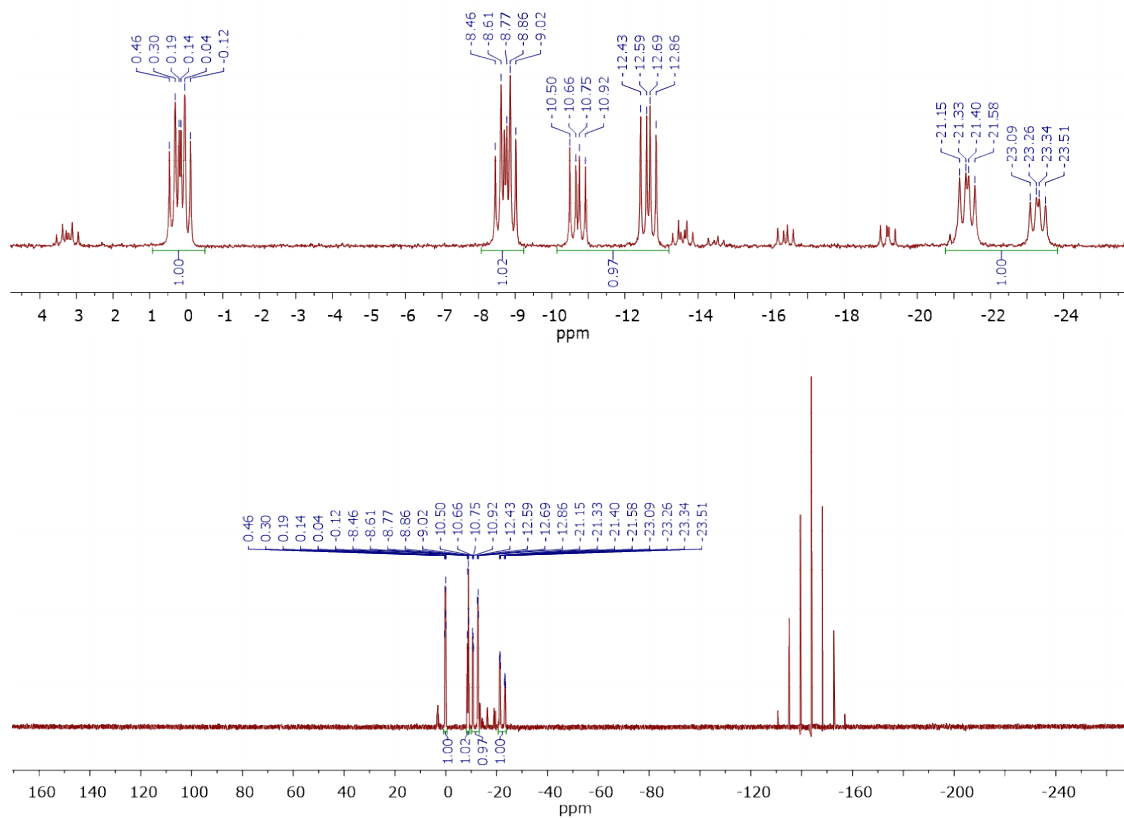

Figure S6.  $^{31}\text{P}\{^1\text{H}\}$  NMR spectrum of the **Ru2** complex in DMSO/ $\text{D}_2\text{O}$ .

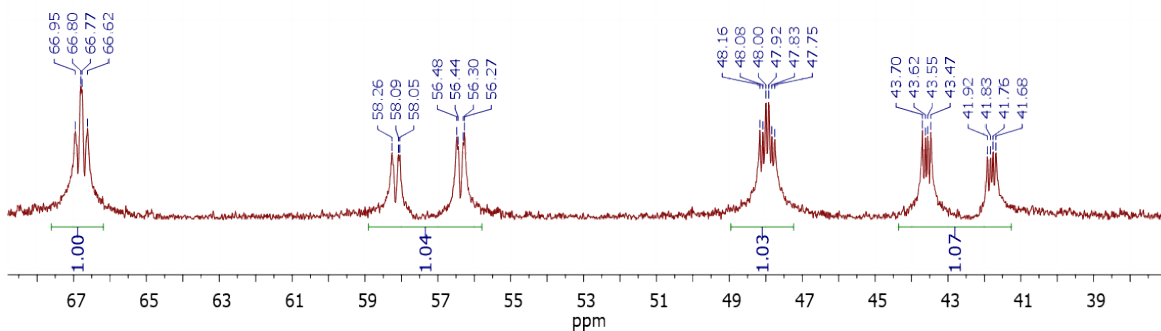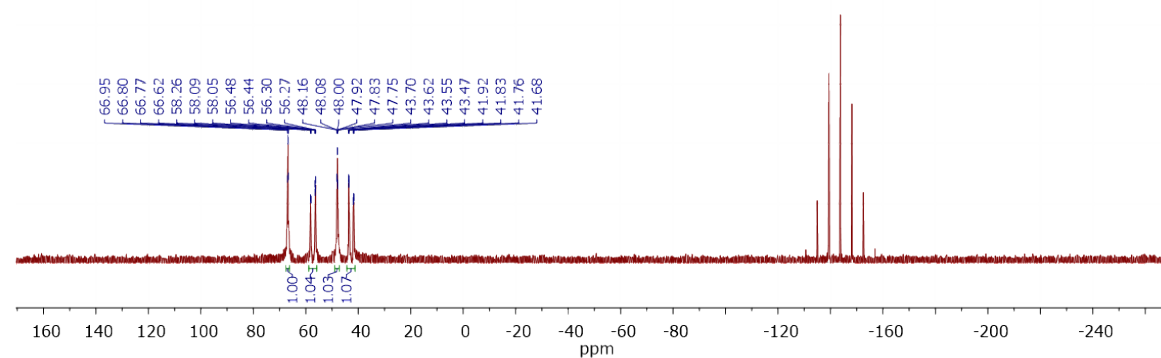

Figure S7.  $^{31}\text{P}\{^1\text{H}\}$  NMR spectrum of the **Ru3** complex in DMSO/ $\text{D}_2\text{O}$ .

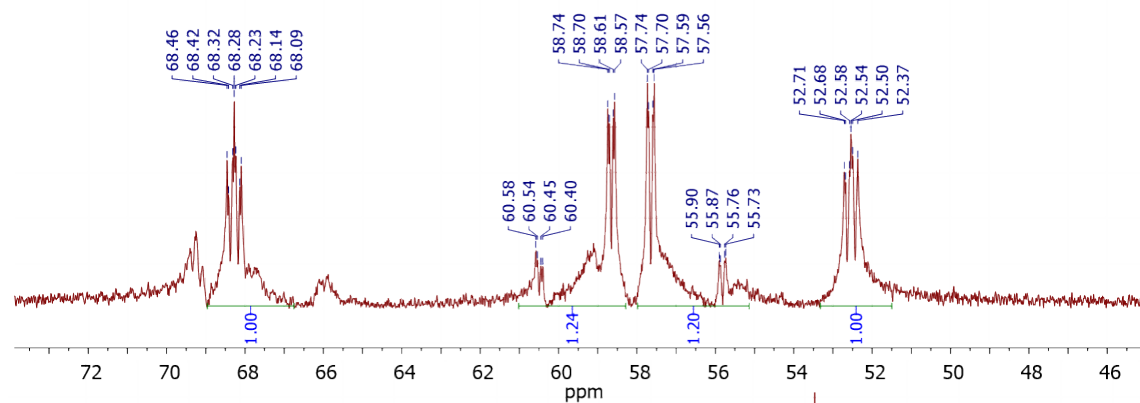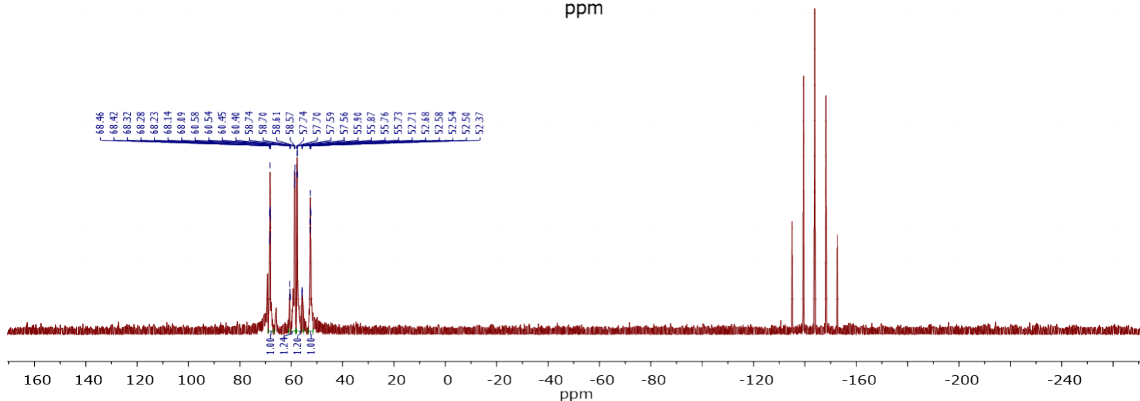

Figure S8.  $^{31}\text{P}\{^1\text{H}\}$  NMR spectrum of the **Ru4** complex in DMSO/ $\text{D}_2\text{O}$ .

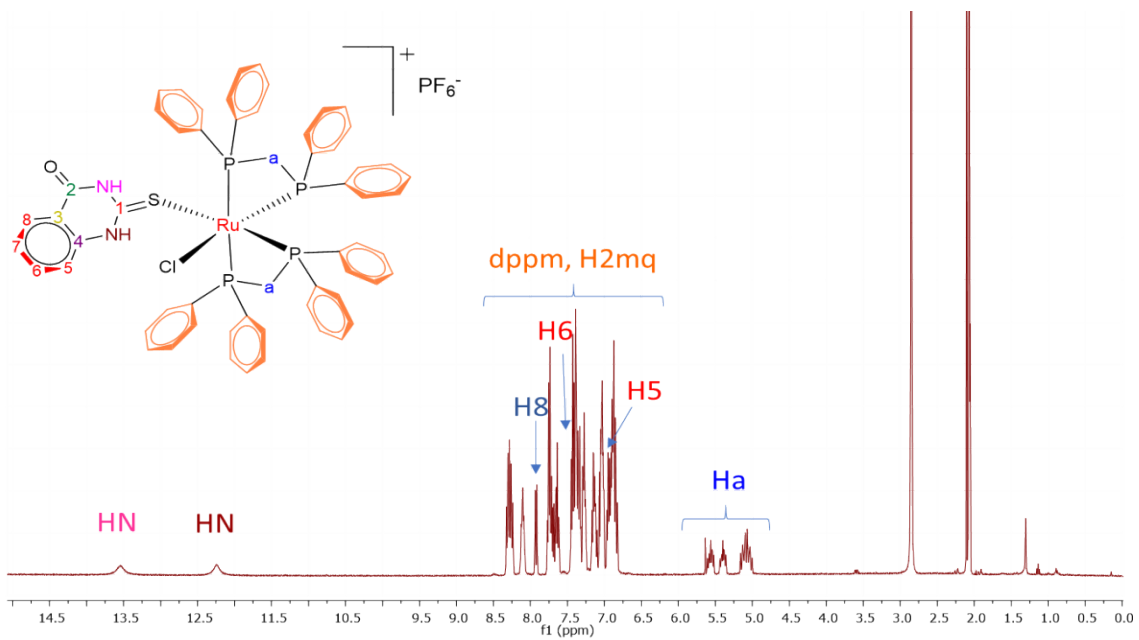

Figure S9.  $^1\text{H}$  NMR spectrum of the Ru1 complex in acetone- $d_6$ .

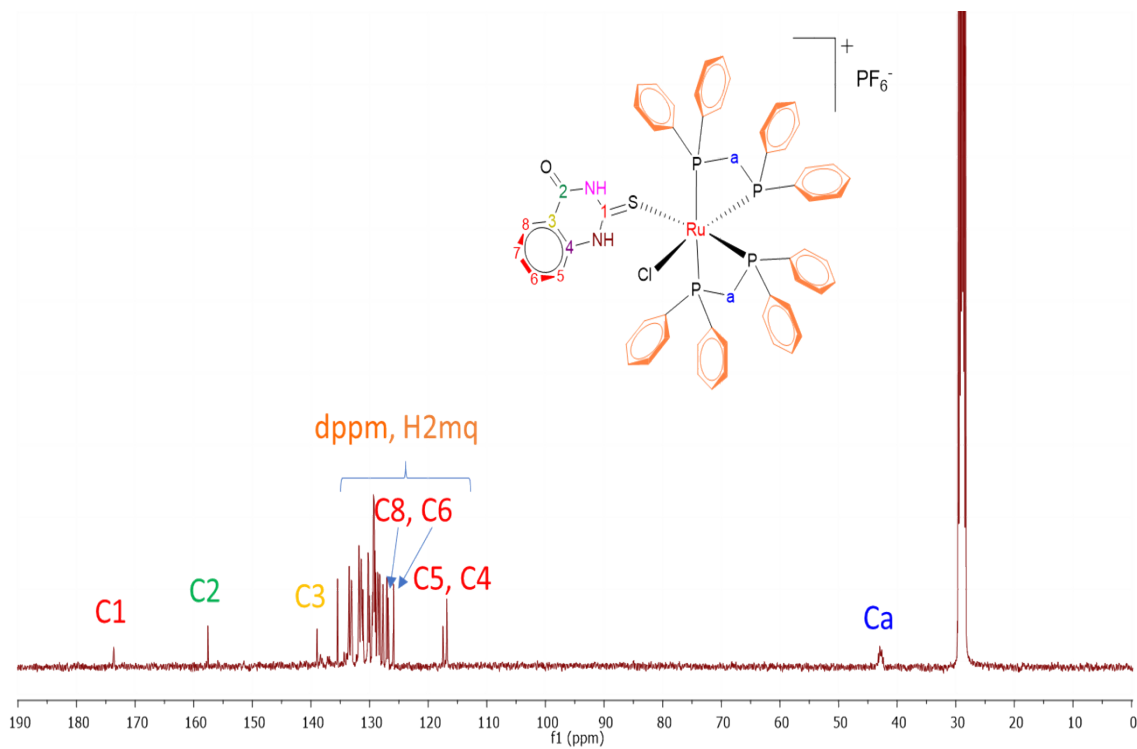

Figure S10.  $^{13}\text{C}\{^1\text{H}\}$  NMR spectrum of the Ru1 complex in acetone- $d_6$ .



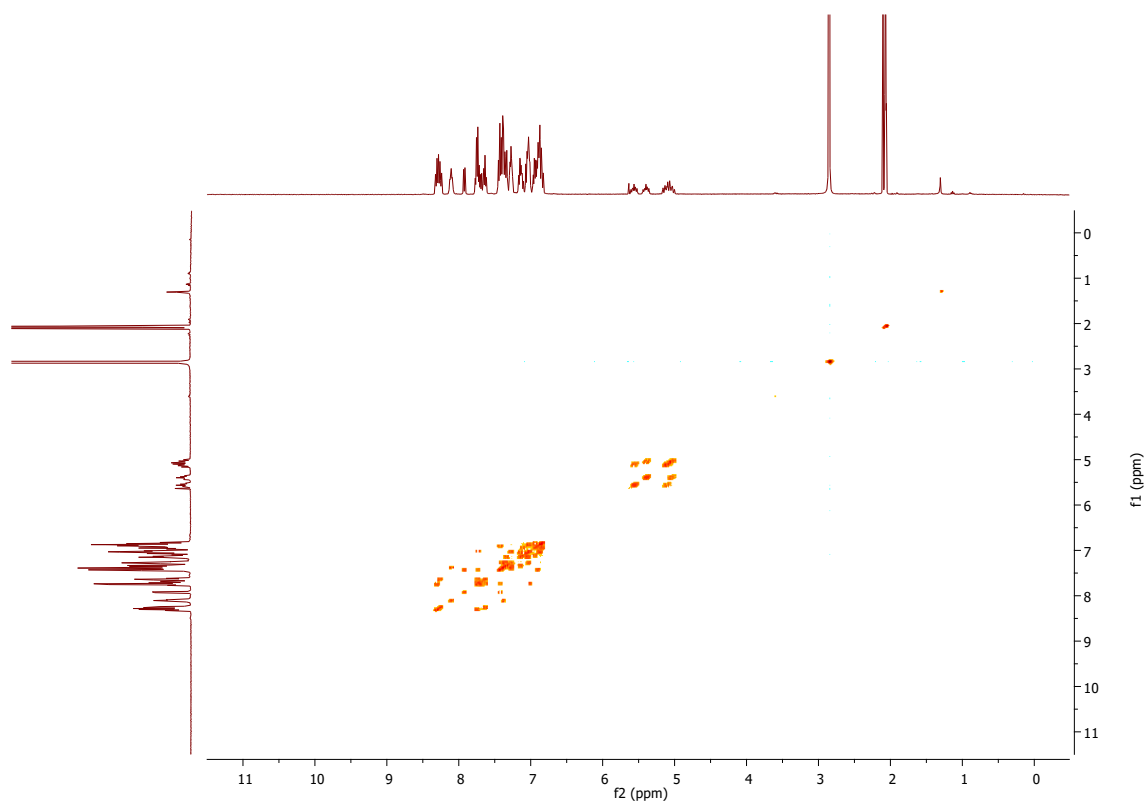

**Figure S11.** Contour map of the  $^1\text{H}$ - $^1\text{H}$  COSY correlation obtained for the Ru1 complex (acetone- $\text{d}_6$ ).

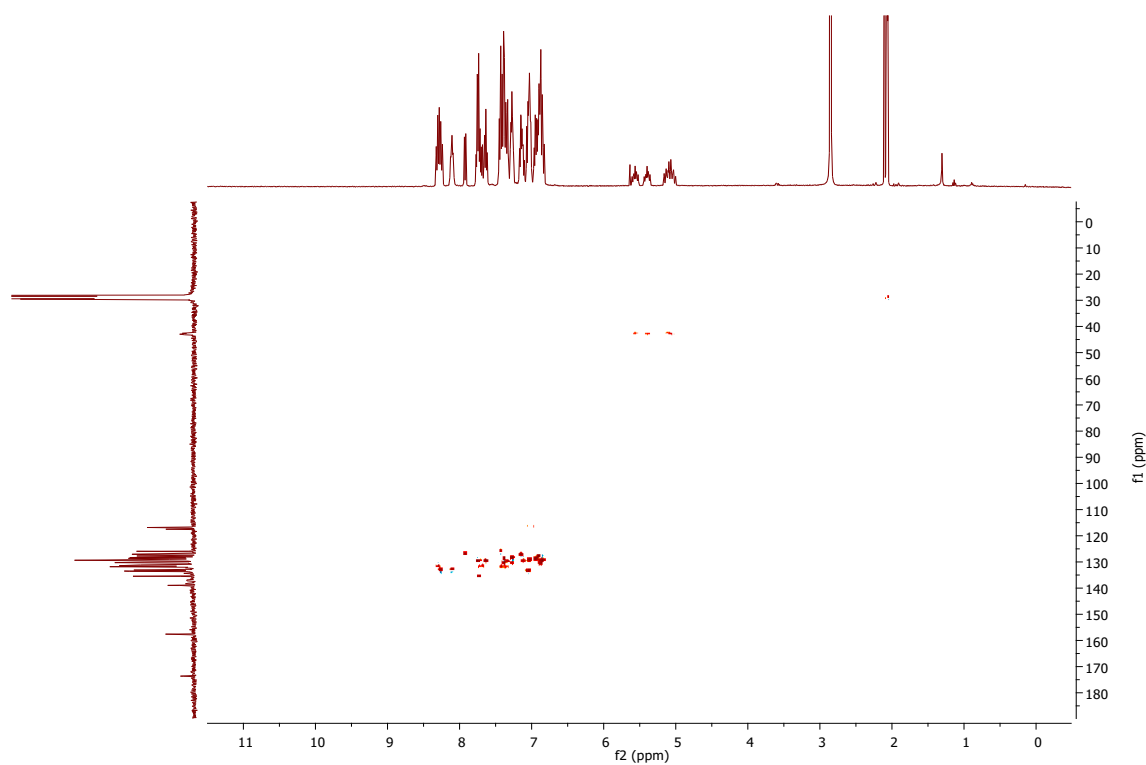

**Figure S12.** Contour map of the  $^1\text{H}$ - $^{13}\text{C}$  HSCQ correlation obtained for the Ru1 complex (acetone- $\text{d}_6$ ).

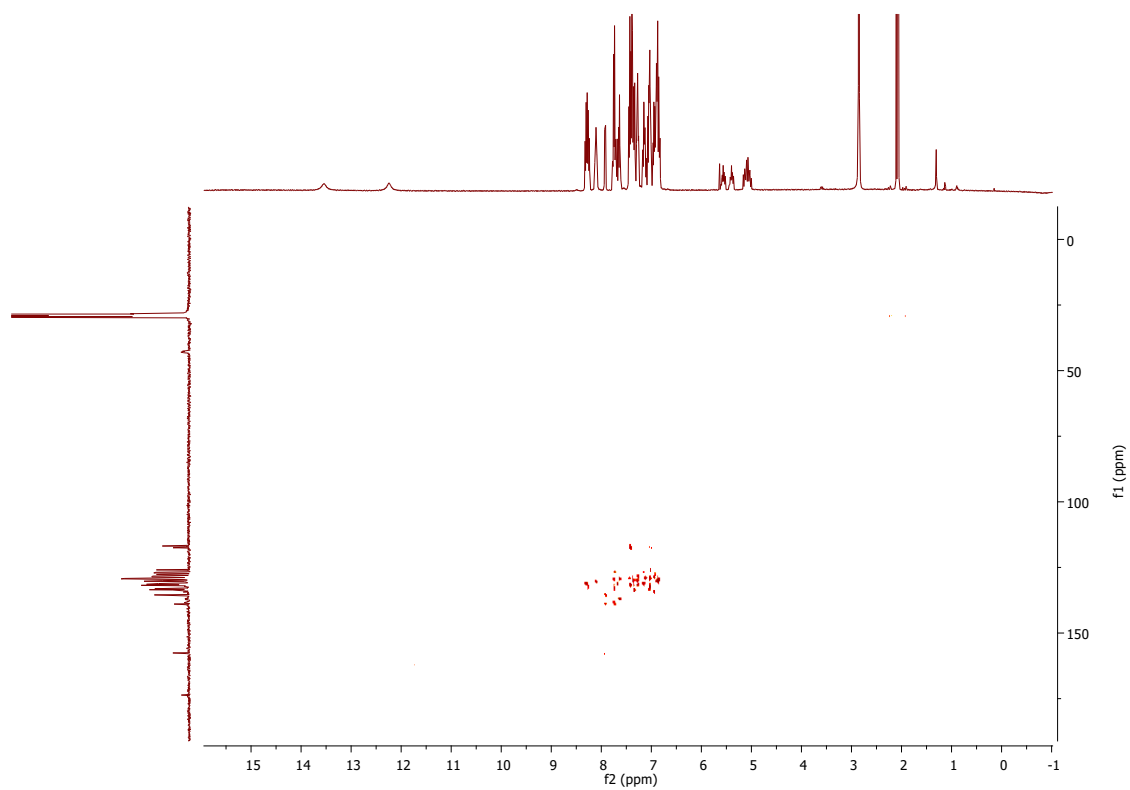

**Figure S13.** Contour map of the  $^1\text{H}$ - $^{13}\text{C}$  HMBC correlation obtained for the Ru1 complex (acetone- $\text{d}_6$ ).

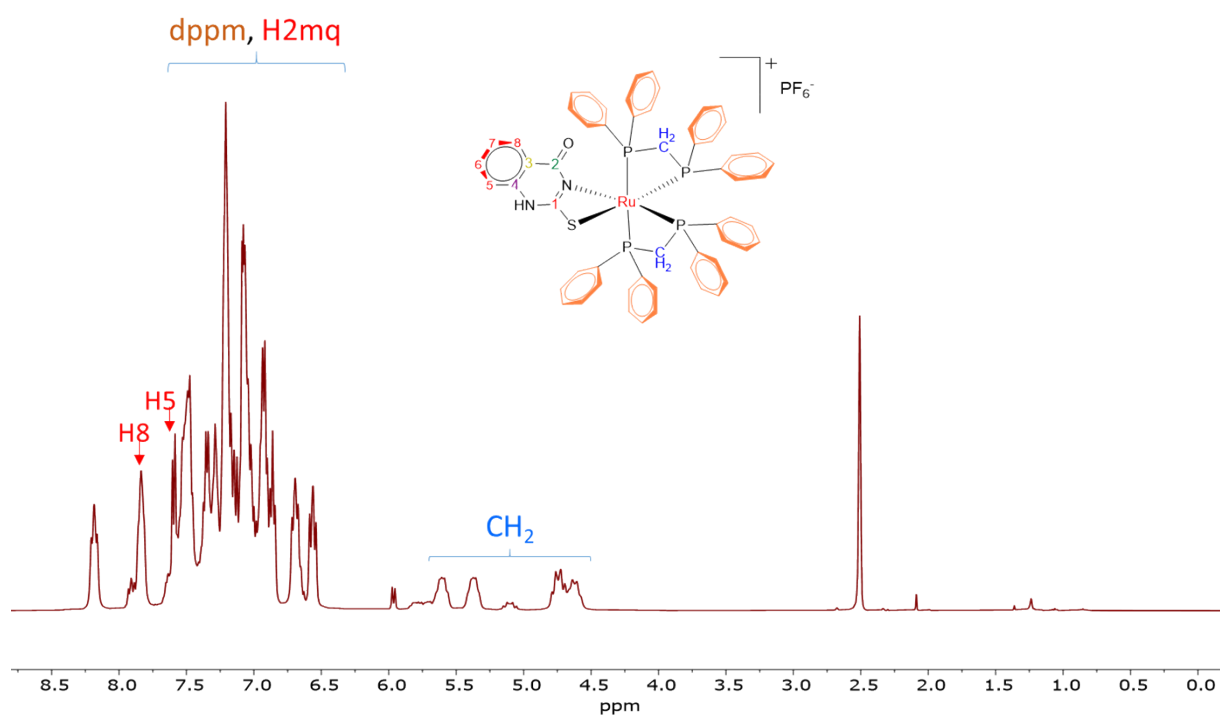

**Figure S14.**  $^1\text{H}$  NMR spectrum of the Ru2 complex in DMSO- $\text{d}_6$ .

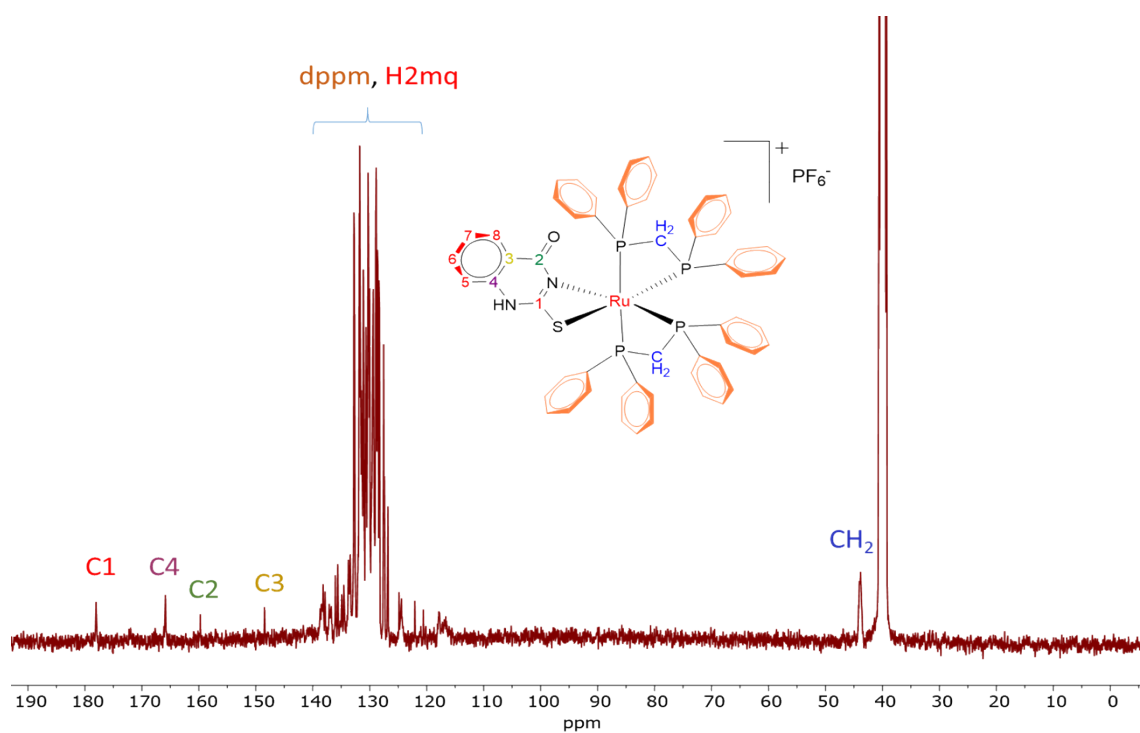

**Figure S15.**  $^{13}\text{C}\{^1\text{H}\}$  NMR spectrum of the **Ru2** complex in  $\text{DMSO-d}_6$ .

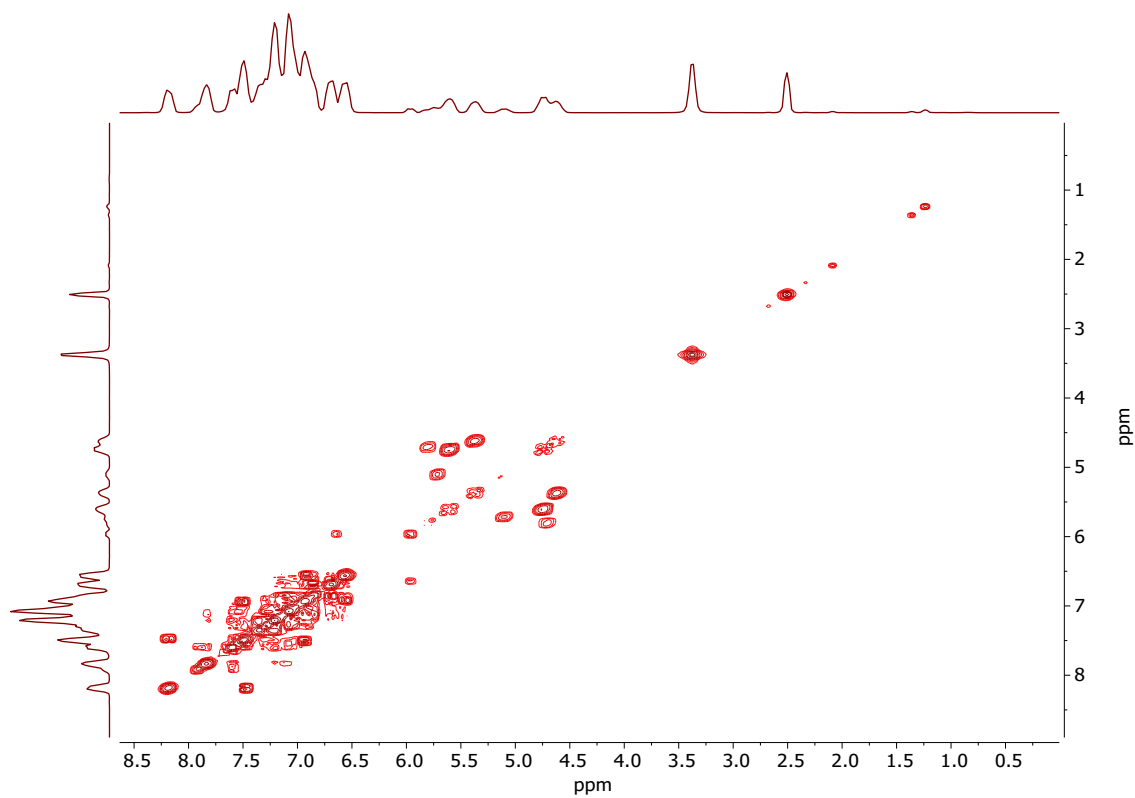

**Figure S16.** Contour map of the  $^1\text{H}$ - $^1\text{H}$  COSY correlation obtained for the **Ru2** complex ( $\text{DMSO-d}_6$ ).

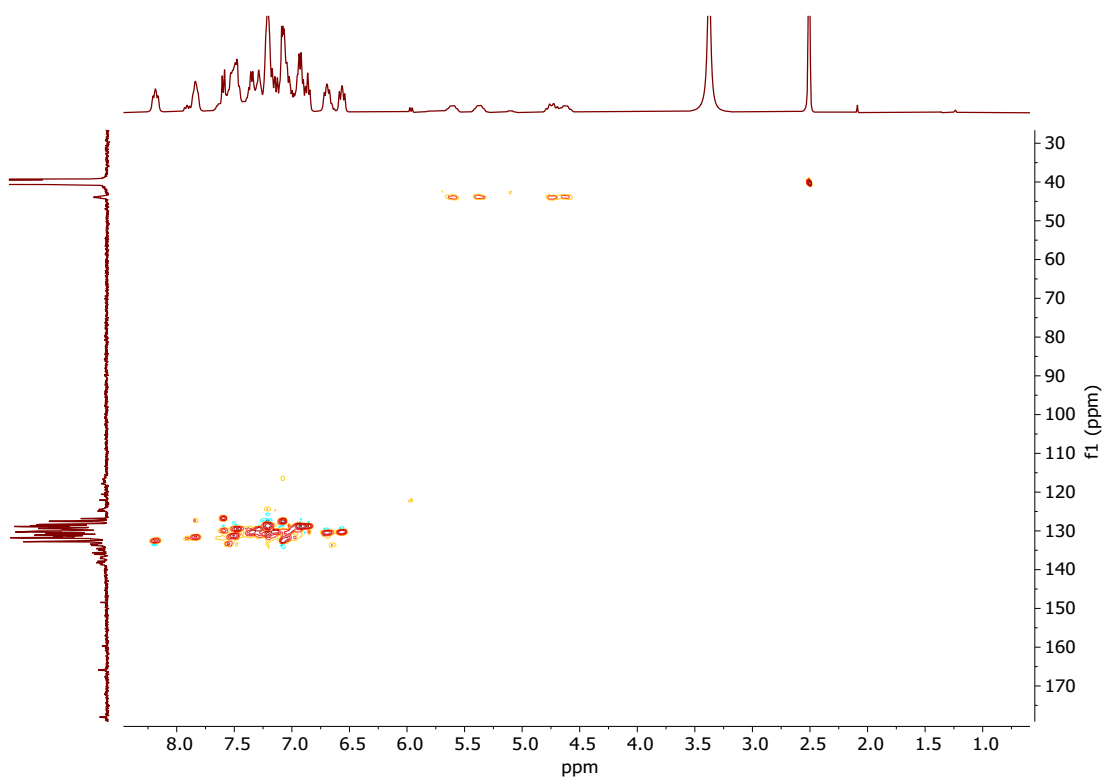

**Figure S17.** Contour map of the  $^1\text{H}$ - $^{13}\text{C}$  HSQC correlation obtained for the **Ru2** complex (DMSO- $d_6$ ).

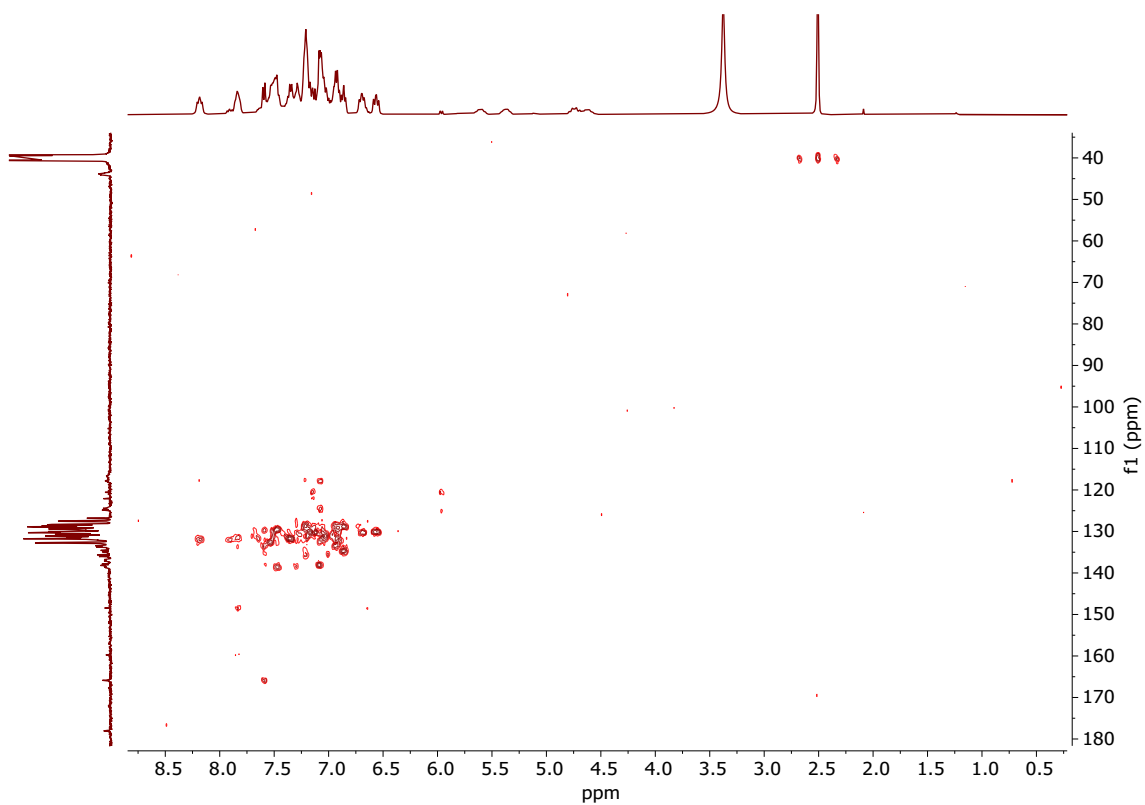

**Figure S18.** Contour map of the  $^1\text{H}$ - $^{13}\text{C}$  HMBC correlation obtained for the **Ru2** complex (DMSO- $d_6$ ).

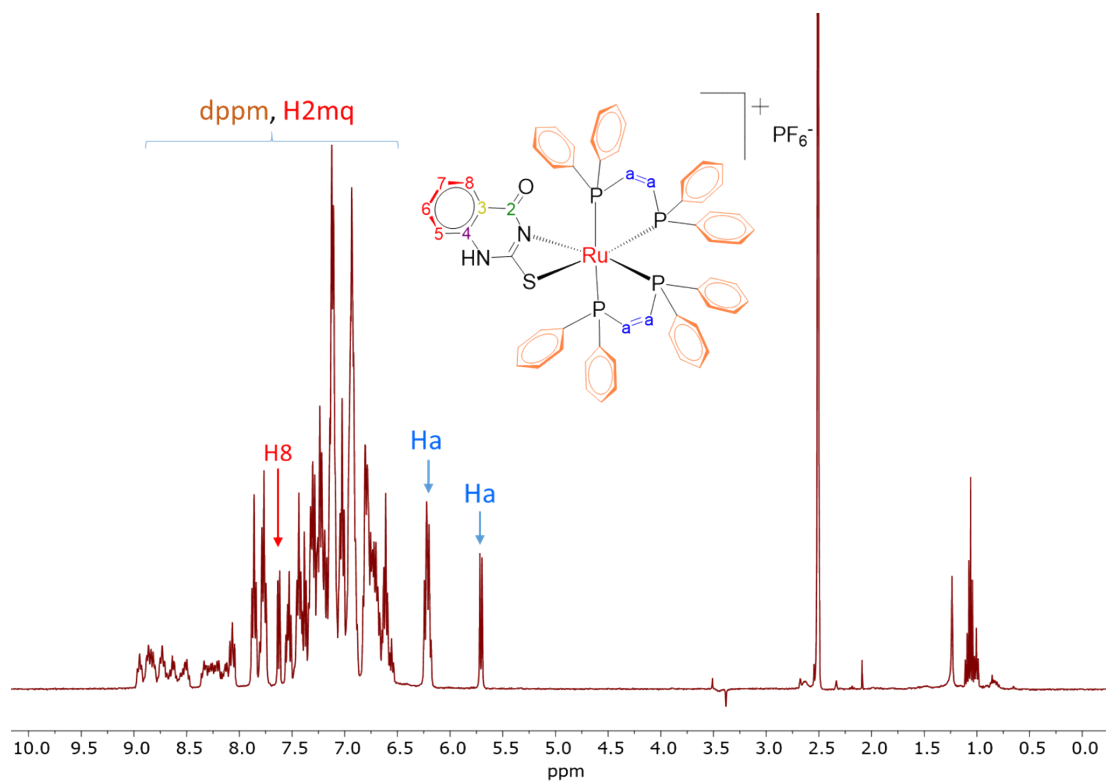

**Figure S19.**  $^1\text{H}$  NMR spectrum of the **Ru4** complex in  $\text{DMSO-d}_6$ .

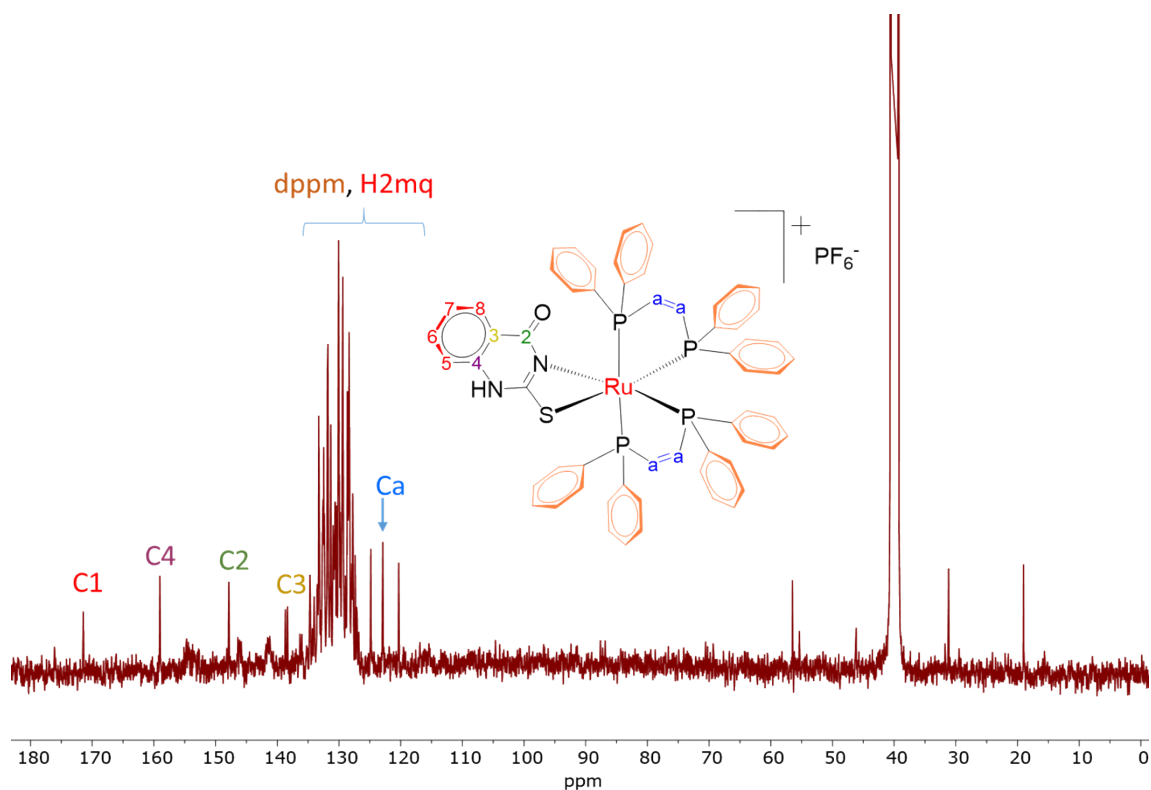

**Figure S20.**  $^{13}\text{C}\{^1\text{H}\}$  NMR spectrum of the **Ru4** complex in  $\text{DMSO-d}_6$ .

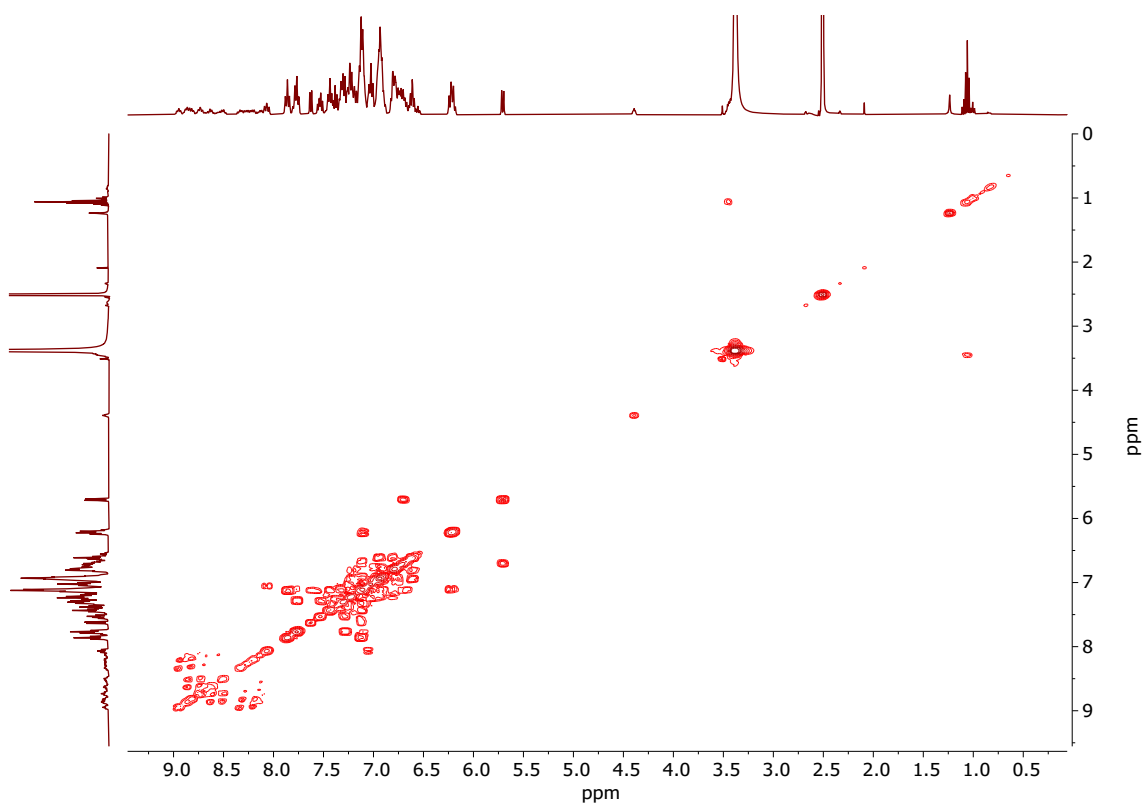

**Figure S21.** Contour map of the  $^1\text{H}$ - $^1\text{H}$  COSY correlation obtained for the **Ru4** complex ( $\text{DMSO-d}_6$ ).

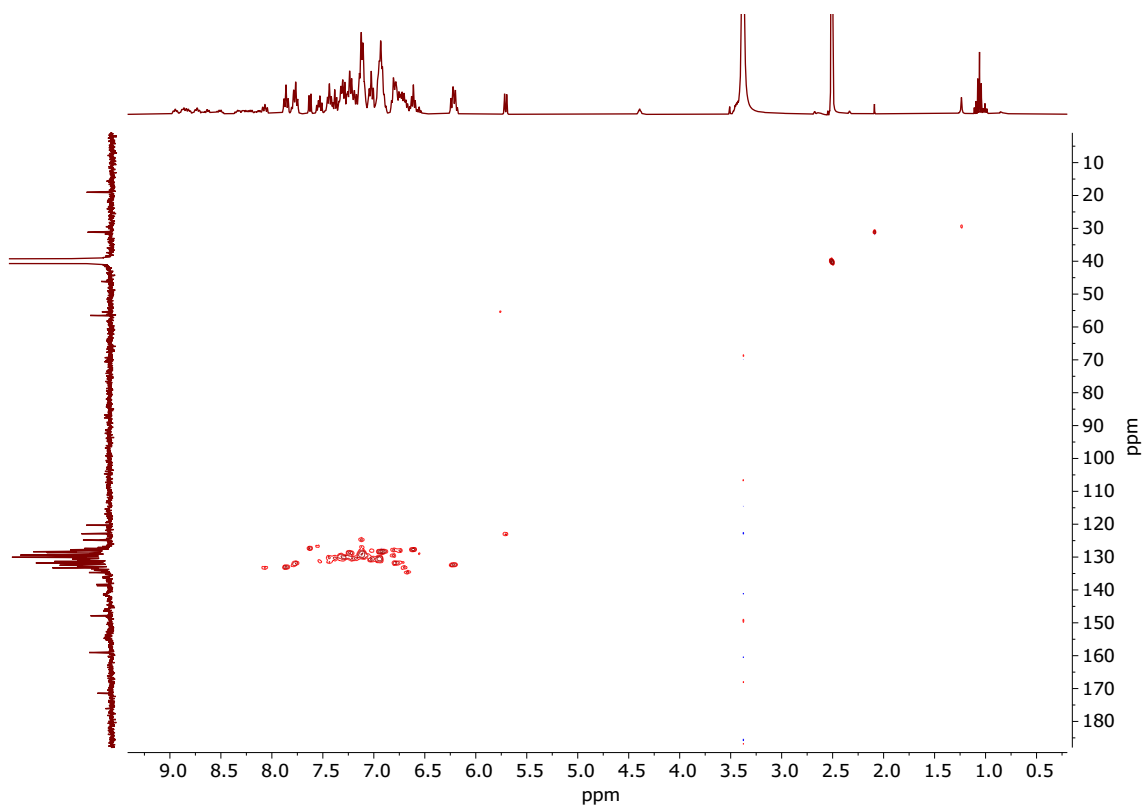

**Figure S22.** Contour map of the  $^1\text{H}$ - $^{13}\text{C}$  HSQC correlation obtained for the **Ru4** complex (DMSO- $d_6$ ).

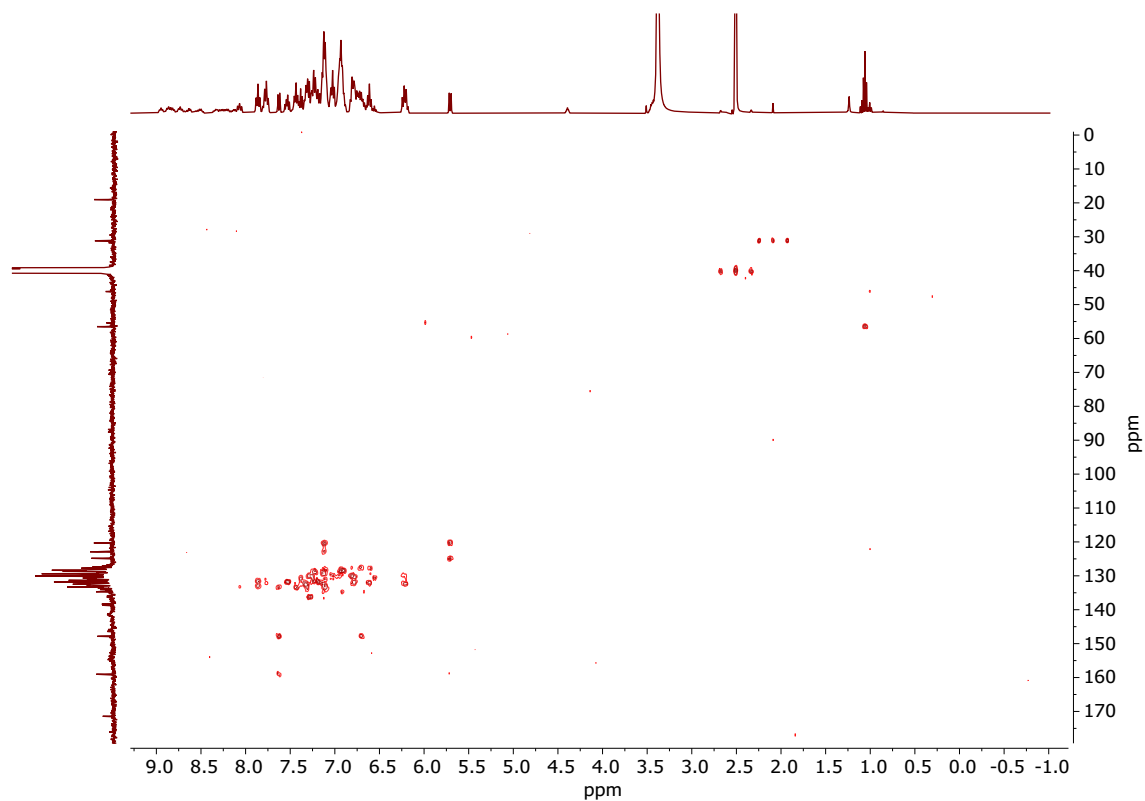

**Figure S23.** Contour map of the  $^1\text{H}$ - $^{13}\text{C}$  HMBC correlation obtained for the **Ru4** complex (DMSO- $d_6$ ).

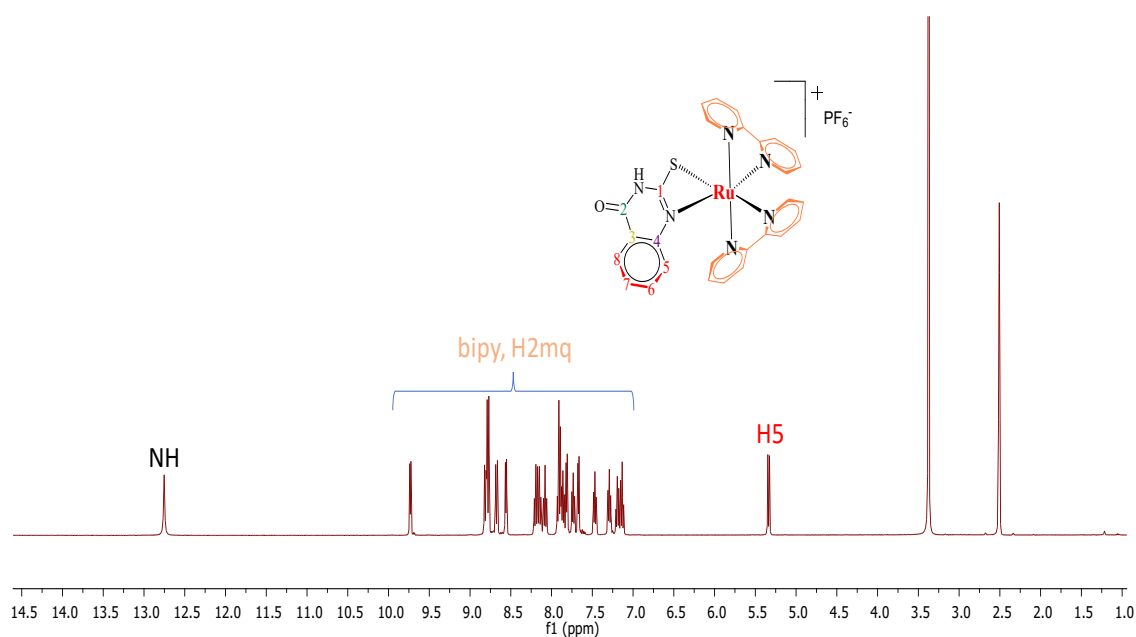

**Figure S24.**  $^1\text{H}$  NMR spectrum of the **Ru5** complex in DMSO- $d_6$ .

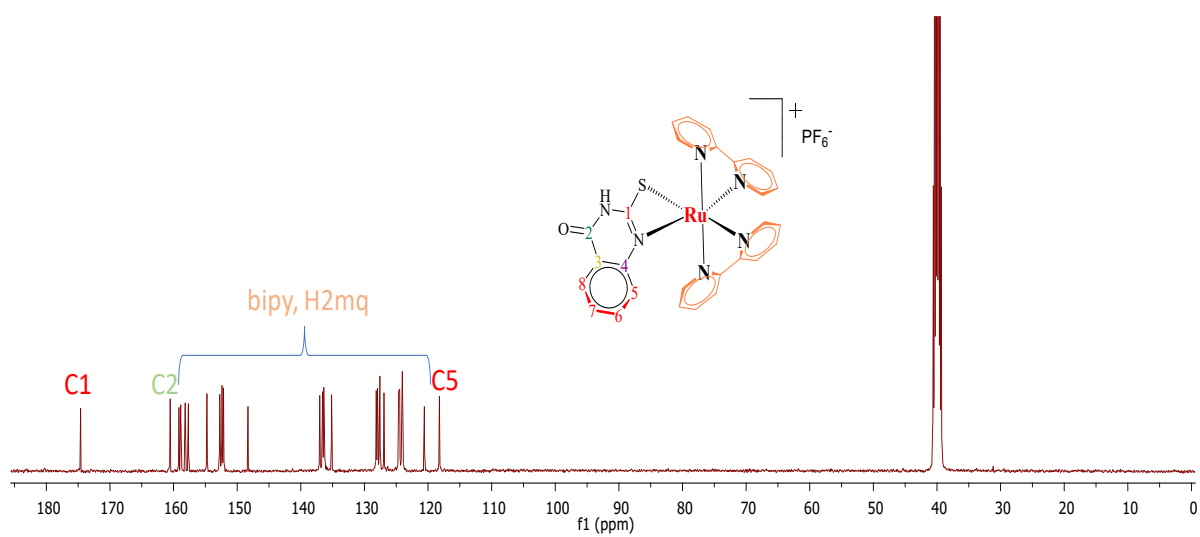

**Figure S25.**  $^{13}\text{C}\{^1\text{H}\}$  NMR spectrum of the **Ru5** complex in  $\text{DMSO-d}_6$ .

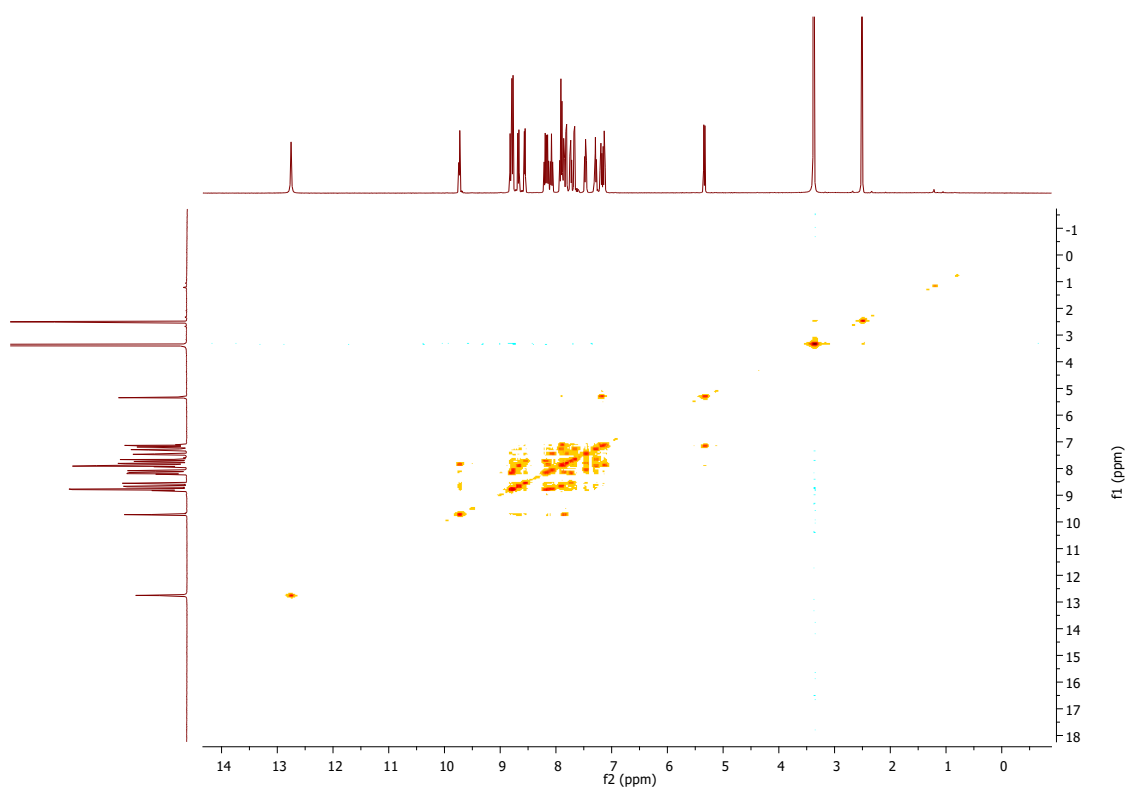

**Figure S26.** Contour map of the  $^1\text{H}$ - $^1\text{H}$  COSY correlation obtained for the **Ru5** complex ( $\text{DMSO-d}_6$ ).



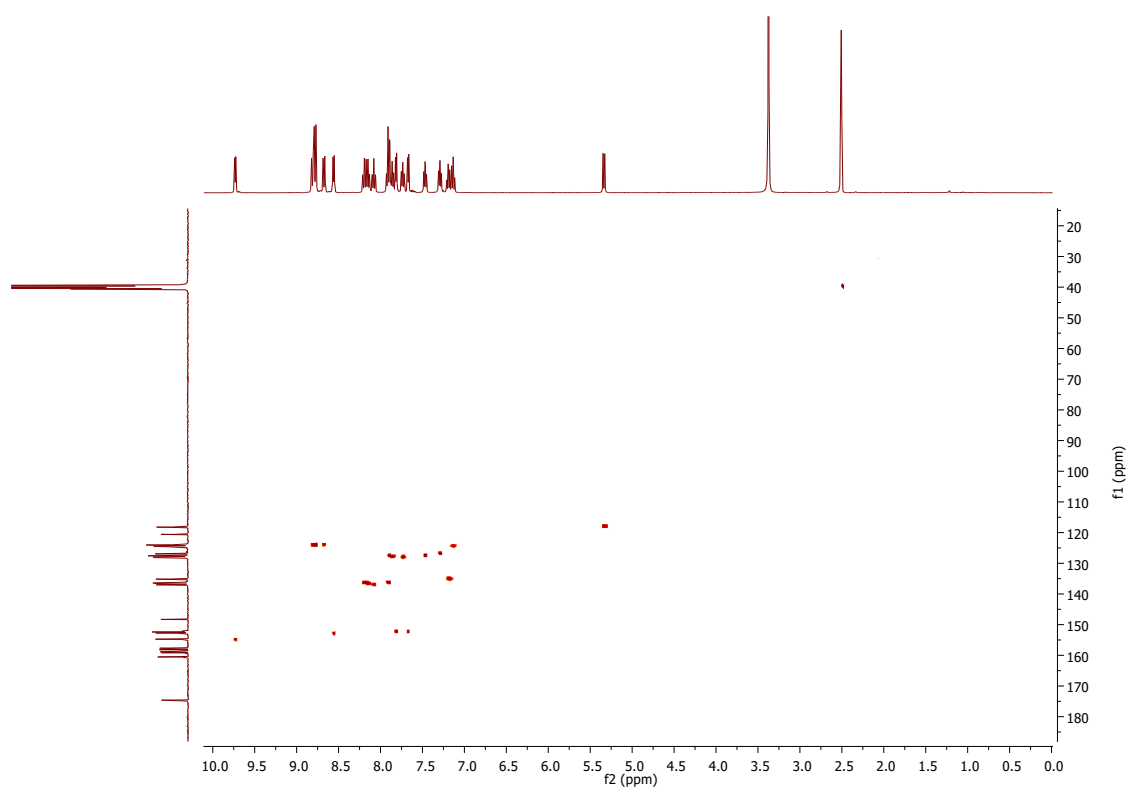

**Figure S27.** Contour map of the  $^1\text{H}$ - $^{13}\text{C}$  HSQC correlation obtained for the **Ru5** complex (DMSO- $d_6$ ).

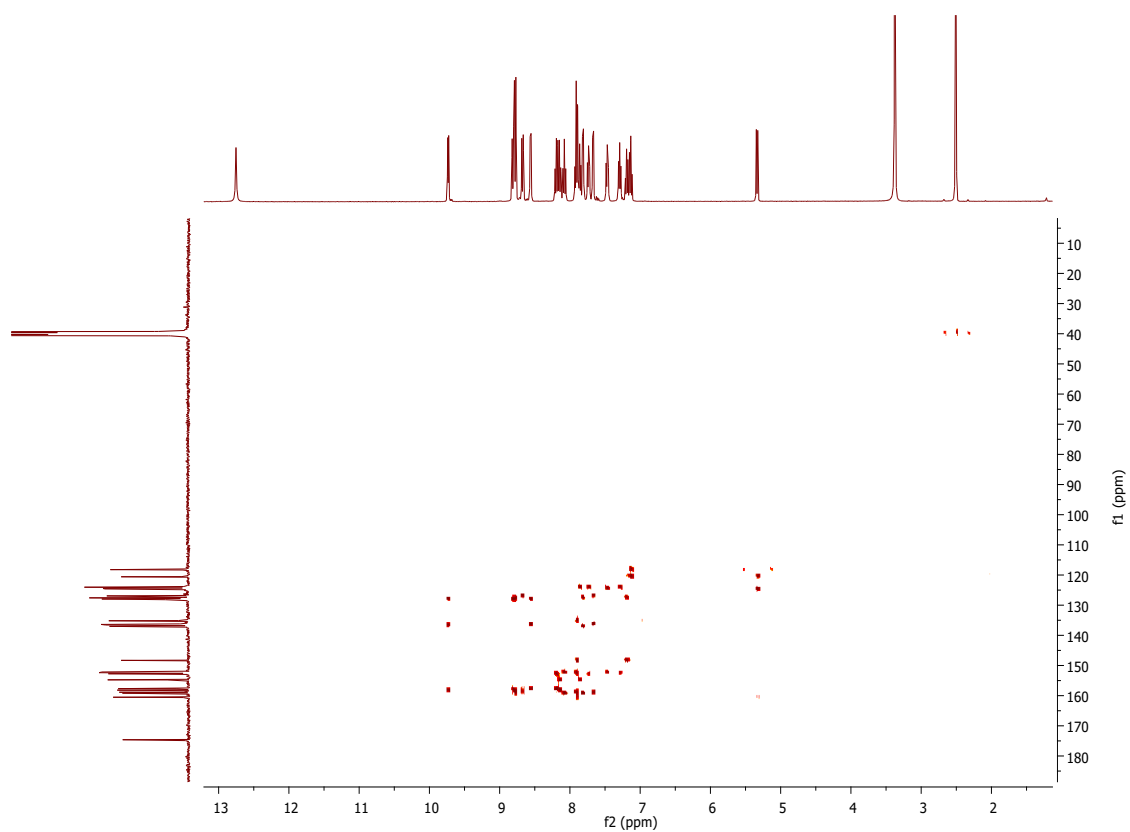

**Figure S28.** Contour map of the  $^1\text{H}$ - $^{13}\text{C}$  HMBC correlation obtained for the **Ru5** complex (DMSO- $d_6$ ).

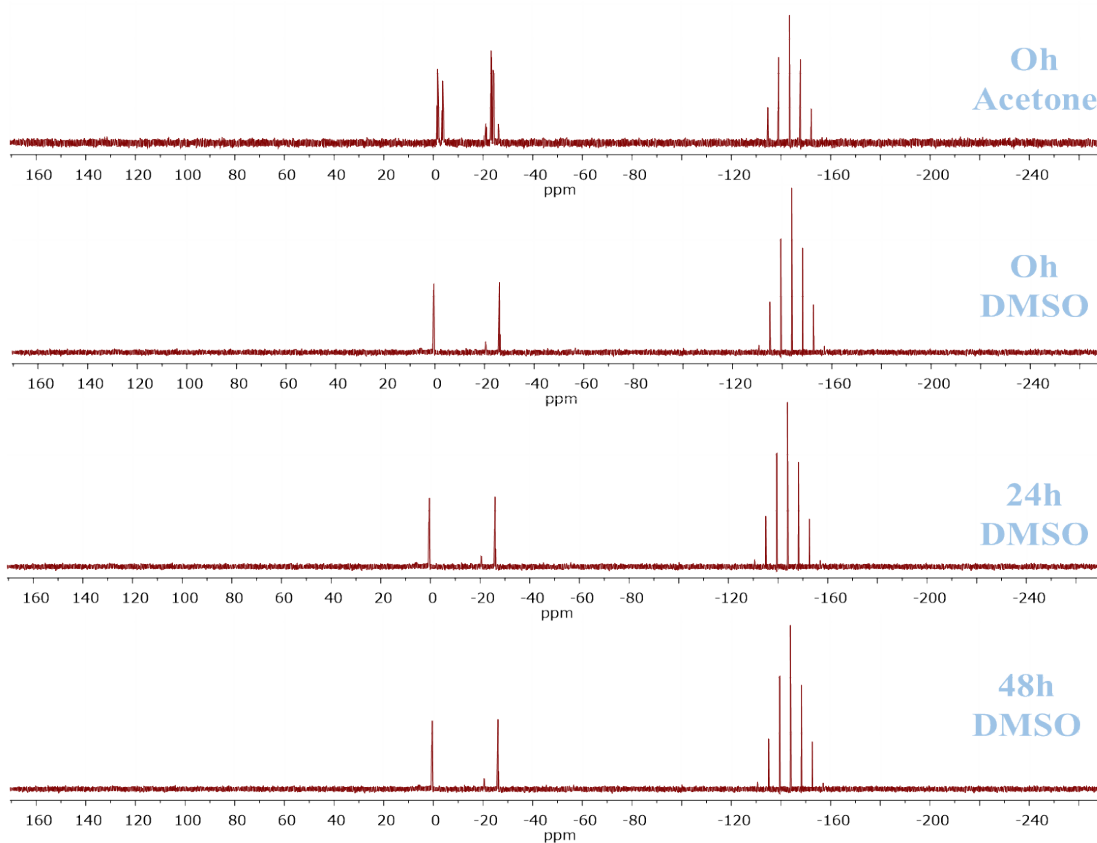

**Figure S29.**  $^{31}\text{P}\{^1\text{H}\}$  NMR spectra in acetone and DMSO of **Ru1** at different times.

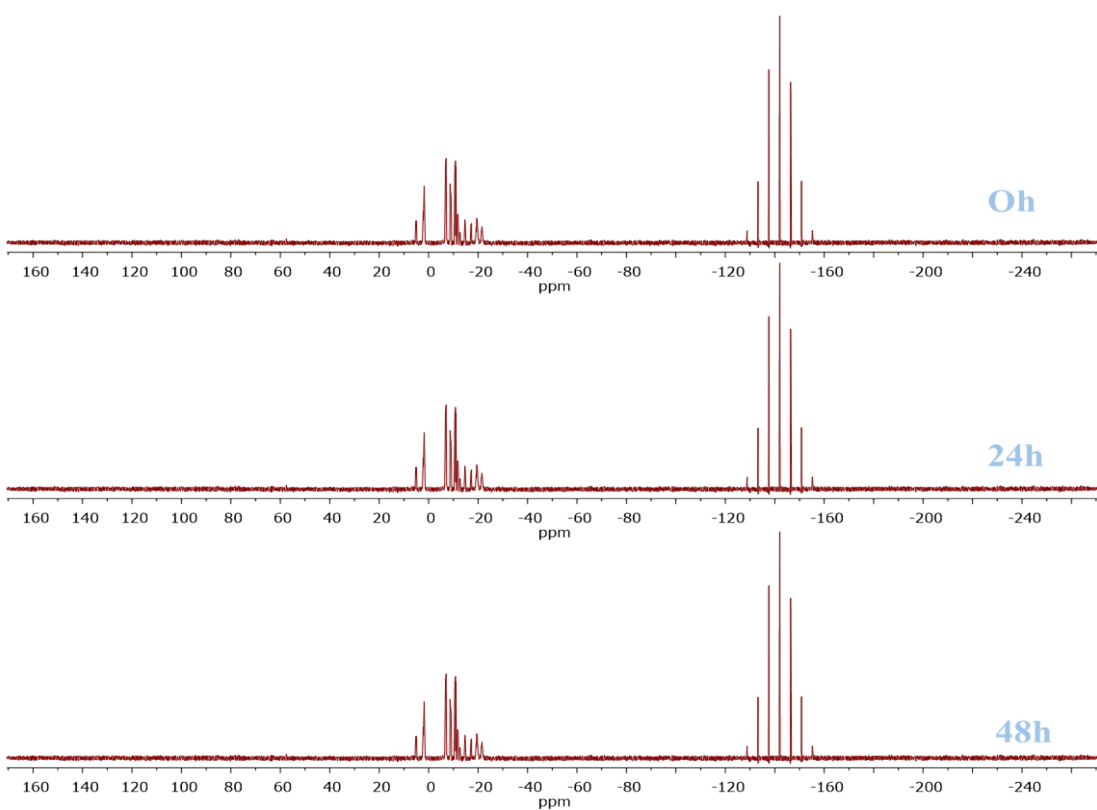

**Figure S30.**  $^{31}\text{P}\{^1\text{H}\}$  NMR spectra in acetone and DMSO of **Ru2** at different times.

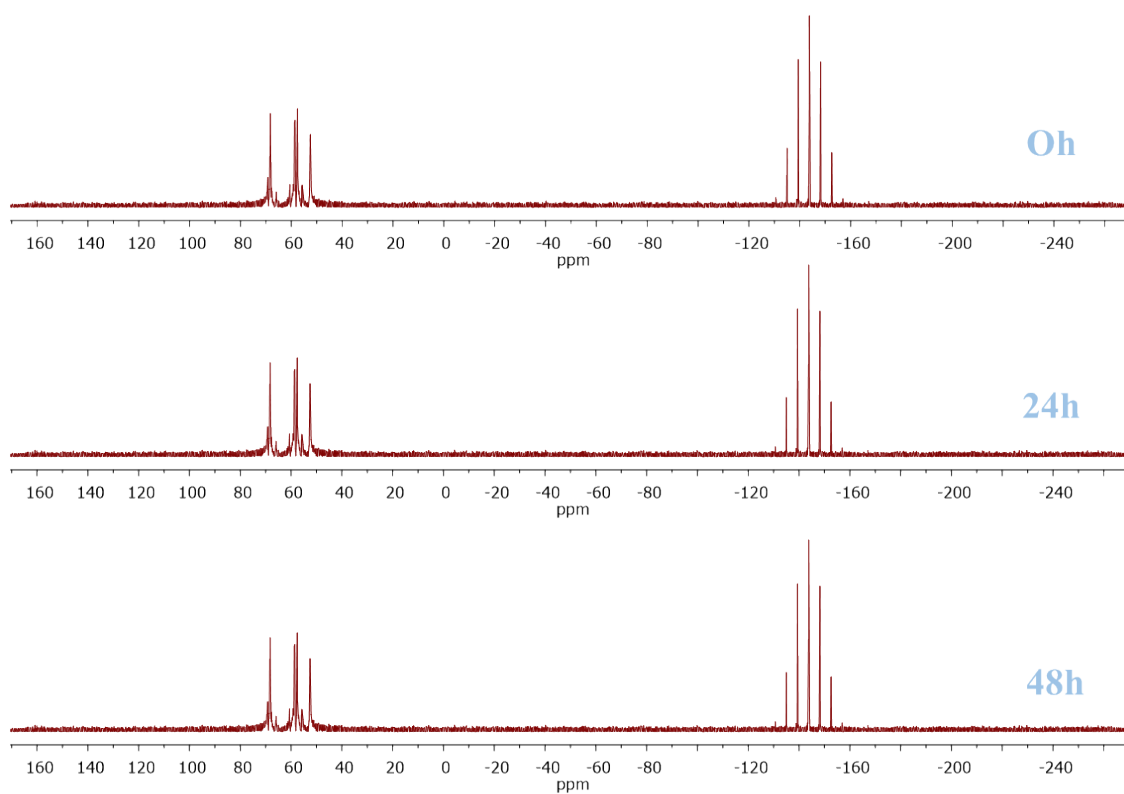

**Figure S31.**  $^{31}\text{P}\{^1\text{H}\}$  NMR spectra in acetone and DMSO of **Ru4** at different times.

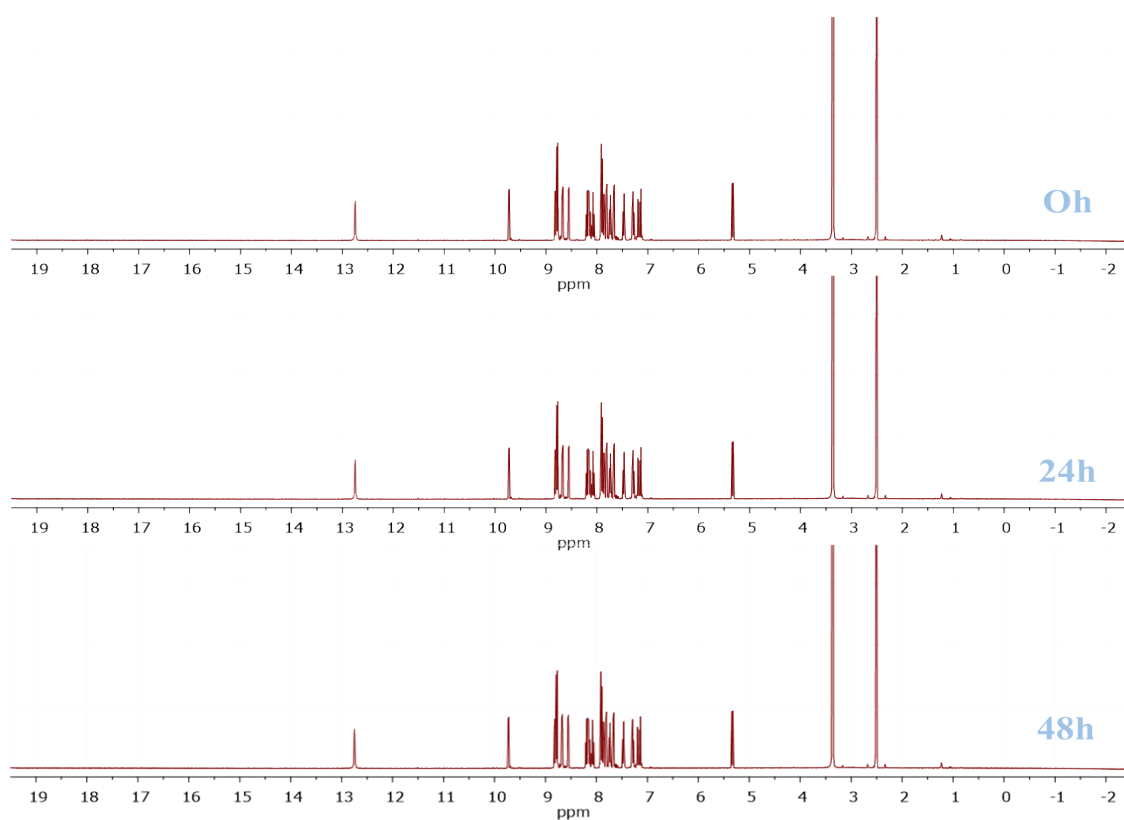

**Figure S32.**  $^1\text{H}$  NMR spectra in acetone and DMSO of **Ru5** at different times.

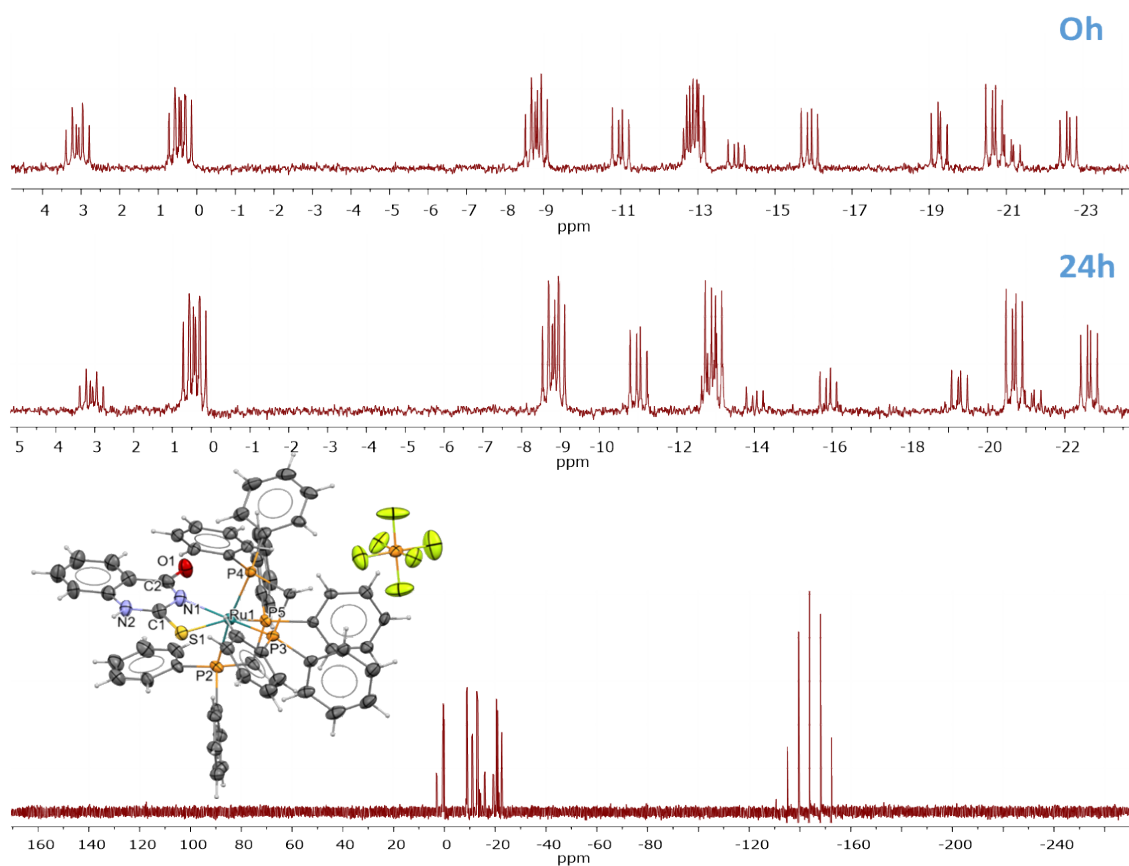

**Figure S33.**  $^{31}\text{P}\{^1\text{H}\}$  NMR spectra in Acetone/culture medium of **Ru1** at different times and crystal obtained from this solution.

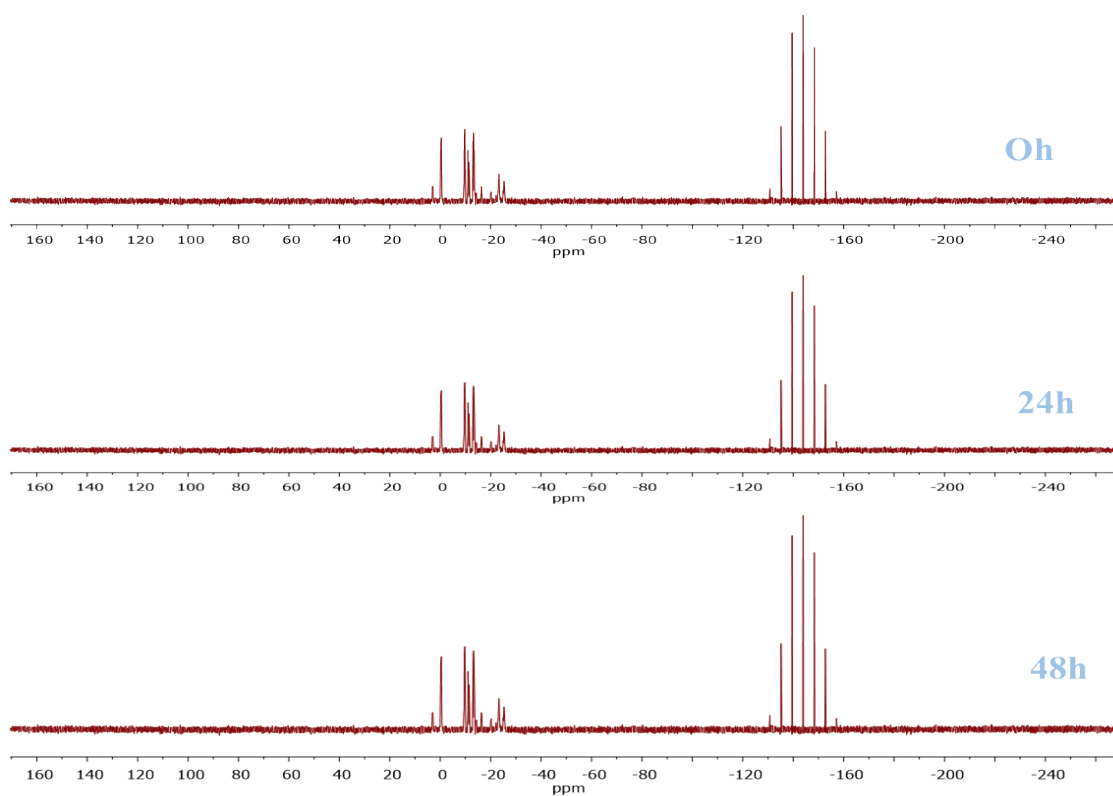

Figure S34.  $^{31}\text{P}\{^1\text{H}\}$  NMR spectra in DMSO/culture medium of **Ru2** at different times.

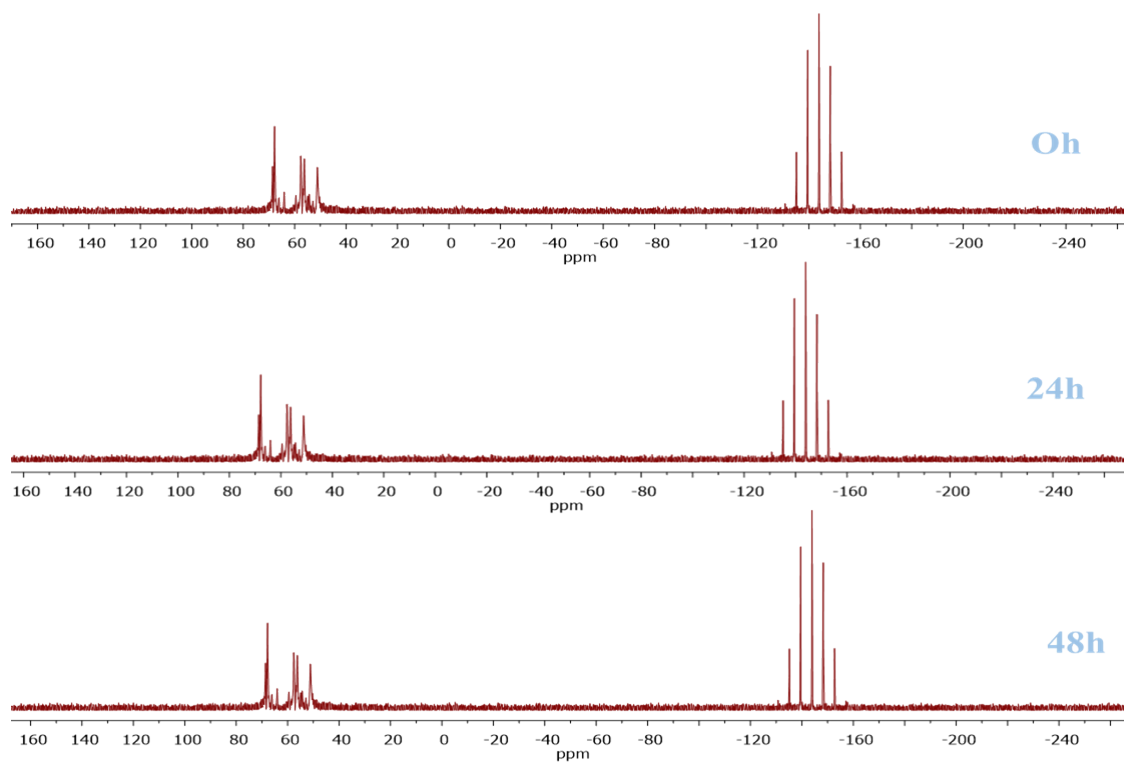

Figure S35.  $^{31}\text{P}\{^1\text{H}\}$  NMR spectra in DMSO/culture medium of **Ru4** at different times.

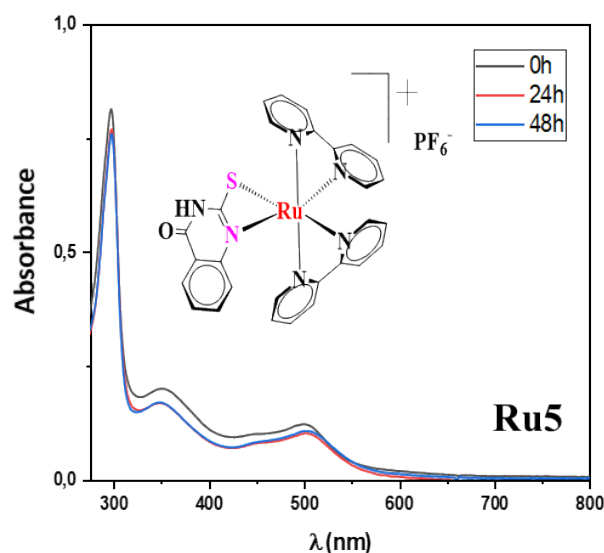

**Figure S36.** UV-Vis spectra in DMSO/culture medium of **Ru5** at different times.

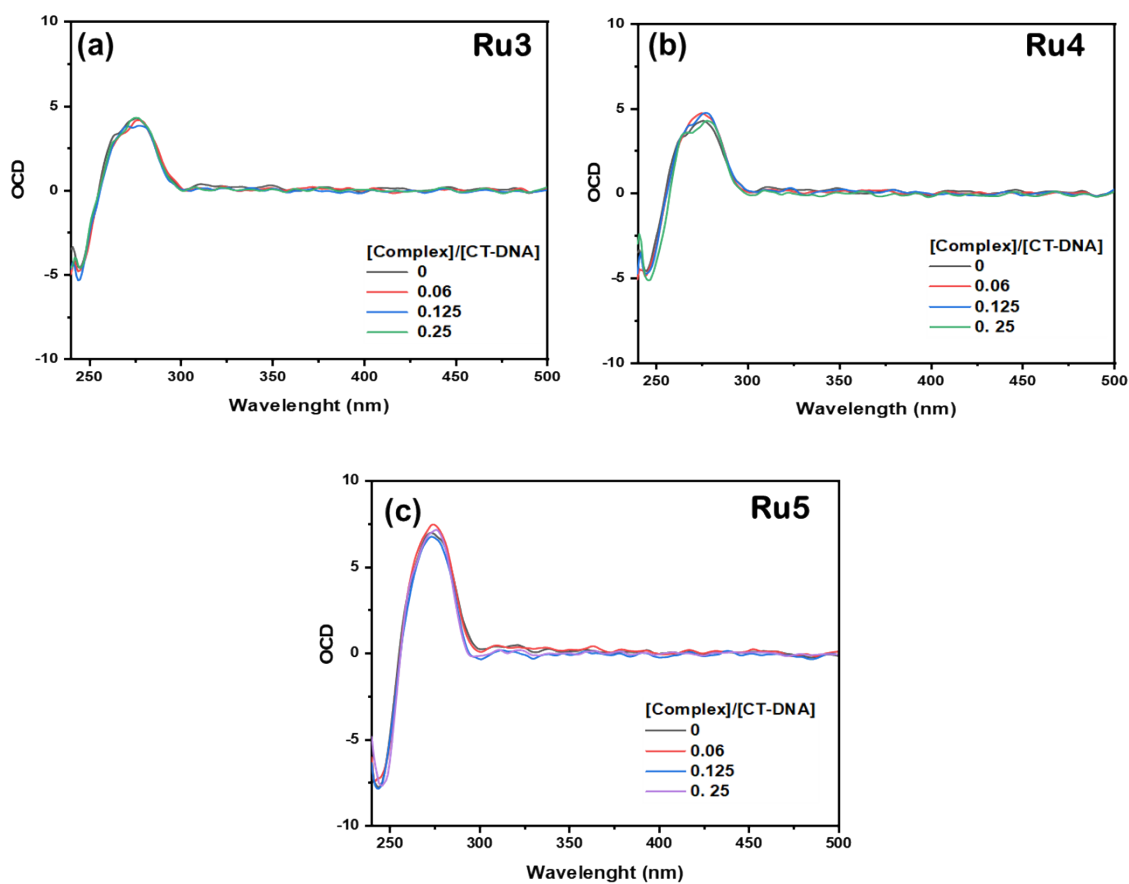

**Figure S37.** (A-C) Circular dichroism spectra of CT-DNA in absence and presence of **Ru3-Ru5** complexes at different molar ratios ( $R_i$ ) = [complex]/[CT-DNA] = 0.06 – 0.25.

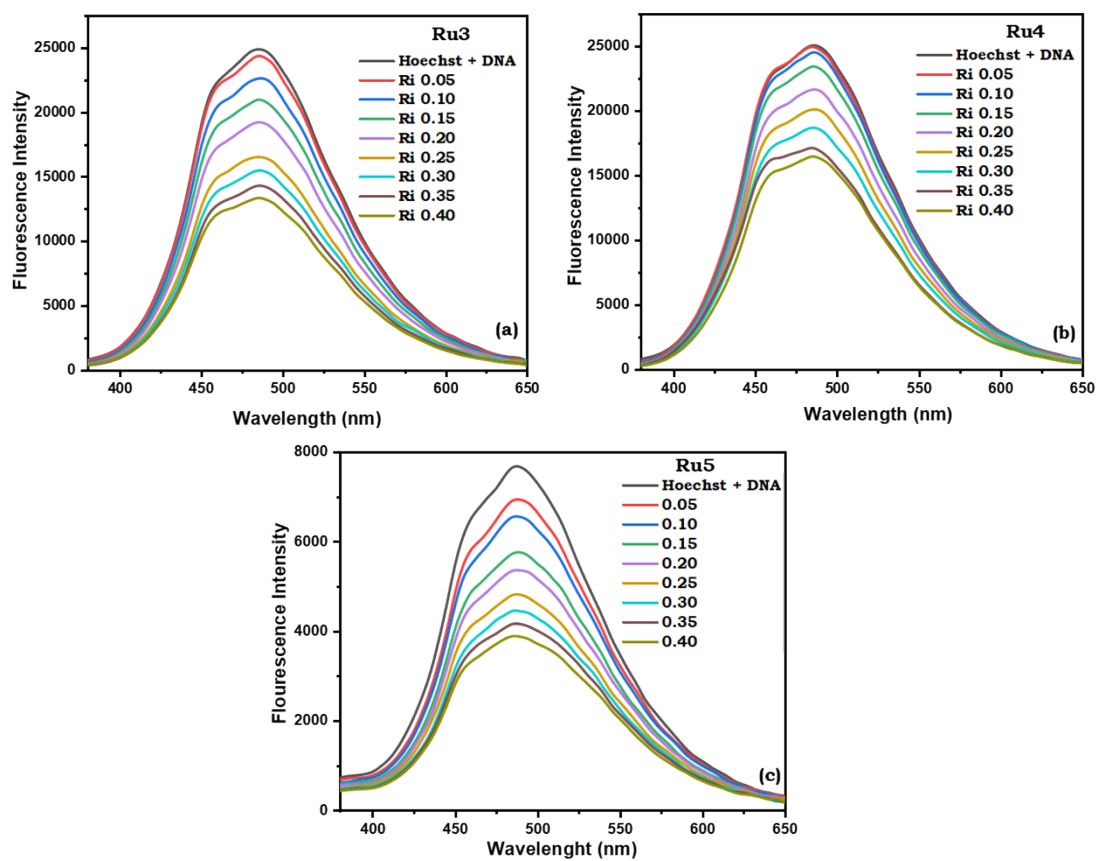

**Figure S38.** (A-C) Fluorescence quenching of CT-DNA-Hoechst ( $\lambda_{\text{ex}} = 343 \text{ nm}$ ) in the absence and presence of different concentrations of **Ru3-Ru5** complexes.

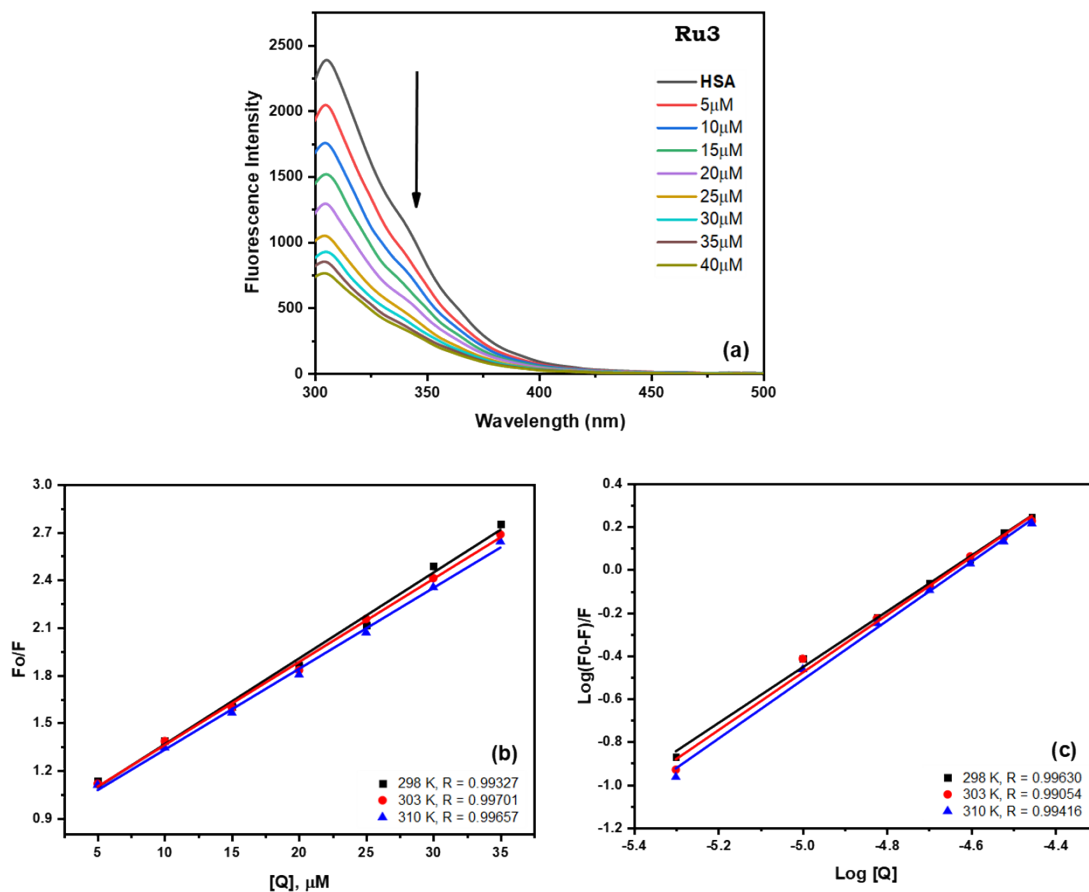

**Figure S39.** (A) Fluorescence spectra of HSA (5  $\mu\text{M}$ ,  $\lambda_{\text{ex}} = 270 \text{ nm}$ ) in the absence and presence of Ru3 complex at different concentrations. (B) Stern-Volmer plot and (C) Plot of  $\log[(F_0-F)/F]$  vs.  $\log [Q]$ , at 298, 303 and 310K.



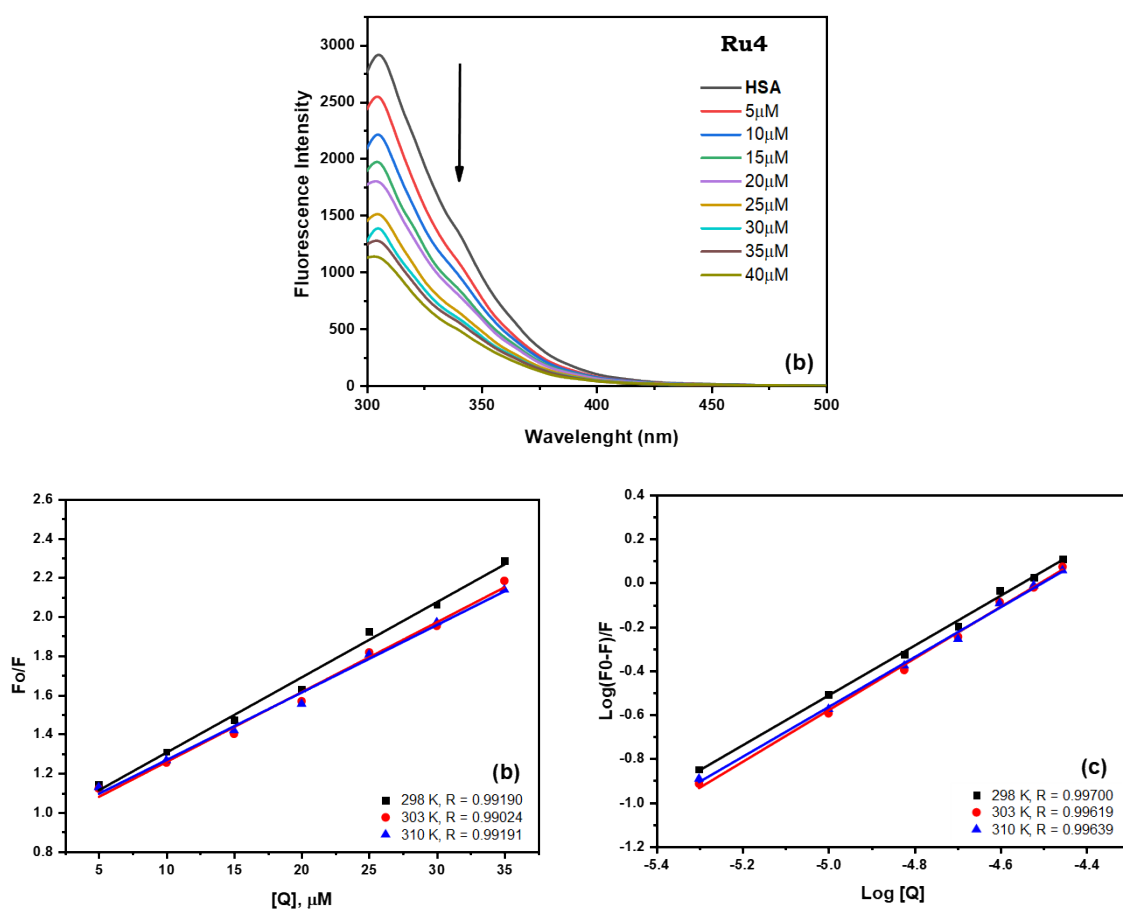

**Figure S40.** (A) Fluorescence spectra of HSA (5  $\mu\text{M}$ ,  $\lambda_{\text{ex}} = 270 \text{ nm}$ ) in the absence and presence of **Ru4** complex at different concentrations. (B) Stern-Volmer plot and (C) Plot of  $\log[(F_0-F)/F]$  vs.  $\log [Q]$ , at 298, 303 and 310K.

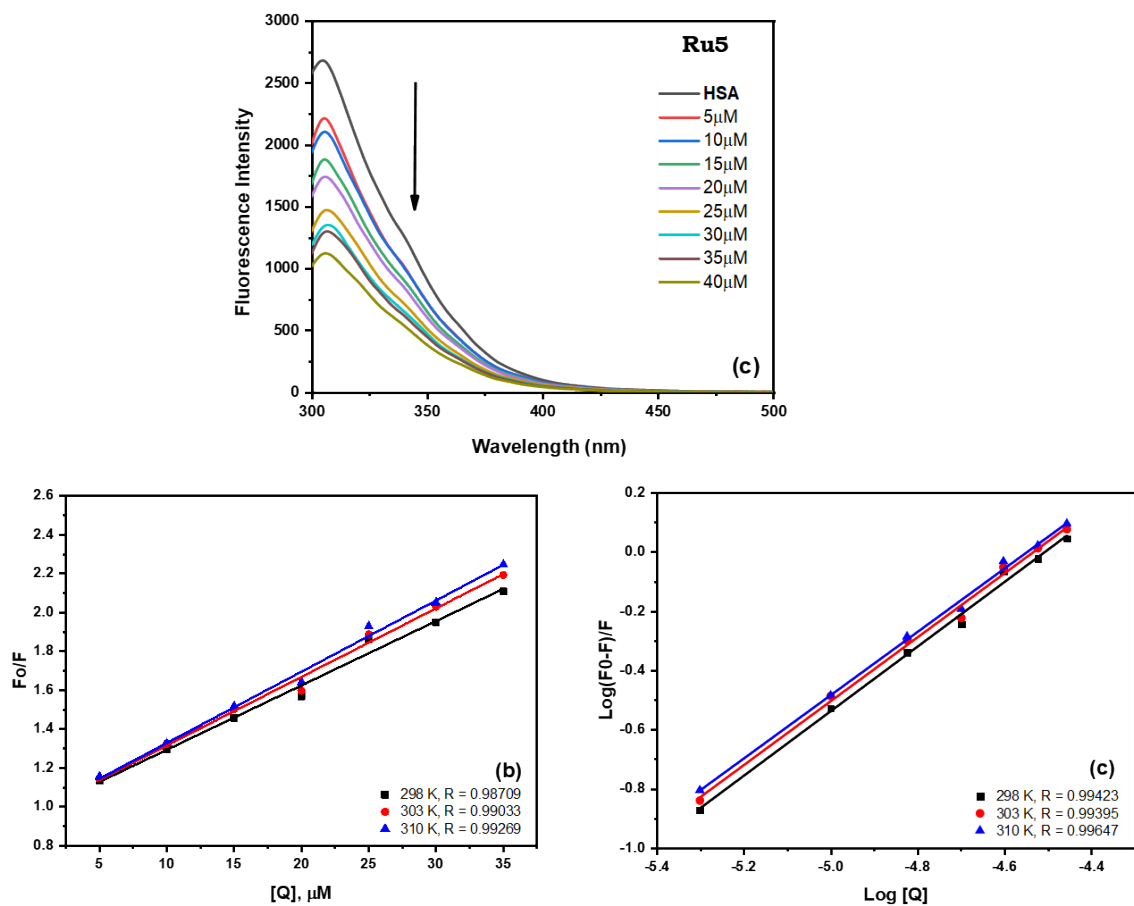

**Figure S41.** (A) Fluorescence spectra of HSA (5  $\mu\text{M}$ ,  $\lambda_{\text{ex}} = 270 \text{ nm}$ ) in the absence and presence of **Ru5** complex at different concentrations. (B) Stern-Volmer plot and (C) Plot of  $\text{log}[(F_0-F)/F]$  vs.  $\text{log}[Q]$ , at 298, 303 and 310K

**Table S1.** Values of coupling constant  ${}^2J_{P-P}$  for the **Ru1**, **Ru2**, **Ru3** and **Ru4** complexes

| Complex    | Phosphorus atoms | $\delta$ | ${}^2J_{P-P}$     |
|------------|------------------|----------|-------------------|
| <b>Ru1</b> | P1               | -2.66    | 41.7; 28.5        |
|            | P2               | -4.73    | 38.2; 27.9        |
|            | P3               | -23.09   | 324.0; 41.8; 27.4 |
|            | P4               | -25.98   | 323.8; 38.5; 29.3 |
| <b>Ru2</b> | P1               | -0.14    | 43.5; 27.2; 24.0  |
|            | P2               | -8.02    | 41.2; 24.9        |
|            | P3               | -10.87   | 314.4; 43.5; 26.5 |
|            | P4               | -21.94   | 314.5; 41.2; 27.7 |
| <b>Ru3</b> | P1               | 66.79    | 23.2              |
|            | P2               | 57.29    | 291.5; 25.1       |
|            | P3               | 47.97    | 25.4; 12.4        |
|            | P4               | 42.73    | 288.6; 22.5; 12.3 |
| <b>Ru4</b> | P1               | 67.87    | m                 |
|            | P2               | 59.12    | m                 |
|            | P3               | 57.15    | m                 |
|            | P4               | 52.17    | m                 |

**Table S2.** Crystal data and structure refinement parameters obtained for the **Ru1**, **Ru2**, **Ru5** complexes.

| Complex                                     | Ru1                                                                                 | Ru2                                                                                             | Ru5                                                                               |
|---------------------------------------------|-------------------------------------------------------------------------------------|-------------------------------------------------------------------------------------------------|-----------------------------------------------------------------------------------|
| CCDC code                                   | 2355448                                                                             | 2355449                                                                                         | 2355450                                                                           |
| Empirical formula                           | C <sub>58</sub> H <sub>50</sub> ClF <sub>6</sub> N <sub>2</sub> OP <sub>5</sub> RuS | C <sub>63</sub> H <sub>61</sub> F <sub>6</sub> N <sub>2</sub> O <sub>3</sub> P <sub>5</sub> RuS | C <sub>28</sub> H <sub>23</sub> F <sub>6</sub> N <sub>6</sub> O <sub>2</sub> PRuS |
| Formula weight                              | 1275.27                                                                             | 1.296.188                                                                                       | 753.629                                                                           |
| Temperature/K                               | 100                                                                                 | 100                                                                                             | 100                                                                               |
| Crystal system                              | monoclinic                                                                          | monoclinic                                                                                      | monoclinic                                                                        |
| Space group                                 | P2/c                                                                                | Pn                                                                                              | C2/c                                                                              |
| a/Å                                         | 17.7150(2)                                                                          | 15.2901(3)                                                                                      | 21.8405(3)                                                                        |
| b/Å                                         | 11.48250(12)                                                                        | 11.7639(3)                                                                                      | 13.02075(15)                                                                      |
| c/Å                                         | 28.1918(3)                                                                          | 16.7665(2)                                                                                      | 21.5213(3)                                                                        |
| α/°                                         | 90                                                                                  | 90                                                                                              | 90                                                                                |
| β/°                                         | 99.3892(12)                                                                         | 94.0784(16)                                                                                     | 108.6637(13)                                                                      |
| γ/°                                         | 90                                                                                  | 90                                                                                              | 90                                                                                |
| Volume/Å <sup>3</sup>                       | 5657.75(12)                                                                         | 3008.18(10)                                                                                     | 5798.37(13)                                                                       |
| Z                                           | 4                                                                                   | 2                                                                                               | 8                                                                                 |
| ρ <sub>calc</sub> /cm <sup>3</sup>          | 1.497                                                                               | 1.431                                                                                           | 1.727                                                                             |
| μ/mm <sup>-1</sup>                          | 0.57                                                                                | 4.244                                                                                           | 6.280                                                                             |
| F(000)                                      | 2608                                                                                | 1340                                                                                            | 3041.1                                                                            |
| Crystal size/mm <sup>3</sup>                | 0.128 × 0.119 × 0.05                                                                | 0.149 × 0.127 × 0.069                                                                           | 0.251 × 0.192 × 0.075                                                             |
| Radiation                                   | Mo Kα (λ = 0.71073)                                                                 | Cu Kα (λ = 1.54184)                                                                             | Cu Kα (λ = 1.54184)                                                               |
| 2θ range for data collection/°              | 3.838 to 51.5                                                                       | 9.2 to 140.14                                                                                   | 8.02 to 158.86                                                                    |
| Index ranges                                | -19 ≤ h ≤ 21, -13 ≤ k ≤ 14, -34 ≤ l ≤ 34                                            | -19 ≤ h ≤ 19, -15 ≤ k ≤ 14, -18 ≤ l ≤ 21                                                        | -27 ≤ h ≤ 27, -16 ≤ k ≤ 16, -26 ≤ l ≤ 27                                          |
| Reflections collected                       | 43832                                                                               | 71455                                                                                           | 33080                                                                             |
| Independent reflections                     | 10730 [R <sub>int</sub> = 0.0361, R <sub>sigma</sub> = 0.0234]                      | 9784 [R <sub>int</sub> = 0.0874, R <sub>sigma</sub> = 0.0757]                                   | 6203 [R <sub>int</sub> = 0.0537, R <sub>sigma</sub> = 0.0390]                     |
| Data/restraints/parameters                  | 10730/948/811                                                                       | 9784/215/724                                                                                    | 6203/0/397                                                                        |
| Goodness-of-fit on F <sup>2</sup>           | 1.111                                                                               | 1.044                                                                                           | 1.037                                                                             |
| Final R indexes [I > 2σ (I)]                | R <sub>1</sub> = 0.0433, wR <sub>2</sub> = 0.1008                                   | R <sub>1</sub> = 0.0586, wR <sub>2</sub> = 0.1445                                               | R <sub>1</sub> = 0.0359, wR <sub>2</sub> = 0.0906                                 |
| Final R indexes [all data]                  | R <sub>1</sub> = 0.0484, wR <sub>2</sub> = 0.1047                                   | R <sub>1</sub> = 0.0615, wR <sub>2</sub> = 0.1468                                               | R <sub>1</sub> = 0.0375, wR <sub>2</sub> = 0.0916                                 |
| Largest diff. peak/hole / e Å <sup>-3</sup> | 0.85/-0.59                                                                          | 1.18/-0.41                                                                                      | 0.94/-1.22                                                                        |

**Table S3.** Selected bond lengths (Å) and angles for **R1**, **Ru2** and **Ru5** complexes.

|            | <b>Ru1</b> | <b>Ru2</b> | <b>Ru5</b> |
|------------|------------|------------|------------|
| C1-S1      | 1.727(5)   | 1.734(7)   | 1.712(3)   |
| C1-N1      | 1.337(6)   | 1.373(9)   | 1.329(3)   |
| Ru1-P1     | 2.347(8)   | 2.368(5)   | --         |
| Ru1-P2     | 2.340(8)   | 2.320(5)   | --         |
| Ru1-P3     | 2.385(8)   | 2.358(5)   | --         |
| Ru1-P4     | 2.320(8)   | 2.301(6)   | --         |
| Ru1-N1     | --         | 2.159(14)  | 2.137(2)   |
| Ru1-S1     | 2.427(9)   | 2.439(5)   | 2.439(6)   |
| Ru1-N3     | --         | --         | 2.055(2)   |
| Ru1-N4     | --         | --         | 2.048(2)   |
| Ru1-N5     | --         | --         | 2.052(2)   |
| Ru1-N6     | --         | --         | 2.054(2)   |
| Ru1-C11    | 2.461(8)   | --         | --         |
| P2 -Ru1-P1 | 70.73(3)   | 71.379(18) | --         |
| P3-Ru1-P4  | 71.84(3)   | 71.557(18) | --         |
| S1-Ru1-N1  | --         | 66.70(4)   | 67.21(6)   |
| S1-Ru1-C11 | 89.83(4)   | --         | --         |
| S1-C1-N1   | 123.9(3)   | 110.38(12) | 113.06(19) |
| N5-Ru1-N6  | --         | --         | 78.84(9)   |
| N3-Ru1-N4  | --         | --         | 79.07(9)   |

**Table S4.** Flow times and confidence limits obtained from the viscosity experiments.

|             | <b>Ru2</b>   | <b>Ru3</b>   | <b>Ru4</b>   | <b>Ru5</b>   | <b>Thiazole</b> | <b>Cisplatin</b> |
|-------------|--------------|--------------|--------------|--------------|-----------------|------------------|
| <b>[uM]</b> |              |              |              |              |                 |                  |
| <b>5</b>    | 94.50 ± 0.34 | 84.64 ± 0.19 | 80.39 ± 0.30 | 79.33 ± 0.51 | 72.93 ± 0.28    | 93.73 ± 0.25     |
| <b>10</b>   | 95.50 ± 0.29 | 84.57 ± 0.24 | 80.47 ± 0.17 | 78.40 ± 0.22 | 73.28 ± 0.16    | 93.24 ± 0.21     |
| <b>20</b>   | 96.00 ± 0.13 | 84.60 ± 0.24 | 81.39 ± 0.30 | 79.71 ± 0.43 | 74.03 ± 0.19    | 90.60 ± 0.20     |
| <b>25</b>   | 94.89 ± 0.20 | 84.85 ± 0.27 | 81.52 ± 0.24 | 78.93 ± 0.23 | 74.33 ± 0.23    | 90.30 ± 0.20     |
| <b>30</b>   | 95.35 ± 0.15 | 85.13 ± 0.12 | 81.38 ± 0.33 | 78.21 ± 0.20 | 75.28 ± 0.23    | 89.28 ± 0.19     |
| <b>40</b>   | 95.90 ± 0.22 | 85.73 ± 0.29 | 81.56 ± 0.32 | 79.37 ± 0.37 | 78.23 ± 0.08    | 87.51 ± 0.37     |

**Table S5.** Binding constants (kb) of Ru2-Ru5 with DNA calculated from DNA competition assays using Hoechst 33258.

| <b>Complex</b> | <b>Kb</b>                     |
|----------------|-------------------------------|
| <b>Ru2</b>     | 2.47 x 10 <sup>7</sup> ± 4.69 |
| <b>Ru3</b>     | 3.13 x 10 <sup>7</sup> ± 2.61 |
| <b>Ru4</b>     | 6.92 x 10 <sup>6</sup> ± 2.11 |
| <b>Ru5</b>     | 5.44 x 10 <sup>4</sup> ± 1.05 |

**Table S6.** The thermodynamic interaction parameters of the Ru2-Ru5 complexes with HSA.

| <b>Complex</b> | <b>N</b> | <b>ΔH°<br/>(kJ mol<sup>-1</sup>)</b> | <b>ΔS°<br/>(J mol<sup>-1</sup> K)</b> | <b>ΔG°<br/>(kJ mol<sup>-1</sup>)</b> |
|----------------|----------|--------------------------------------|---------------------------------------|--------------------------------------|
| <b>Ru2</b>     | 0.90     | -2.9                                 | 115.3                                 | -25.7                                |
|                | 0.89     |                                      | 115.3                                 | -26.3                                |
|                | 0.86     |                                      | 115.0                                 | -27.0                                |
| <b>Ru3</b>     | 0.79     | -4.4                                 | 115.0                                 | -26.3                                |
|                | 0.76     |                                      | 115.0                                 | -27.0                                |
|                | 0.73     |                                      | 74.8                                  | -27.5                                |
| <b>Ru4</b>     | 0.92     | -12.4                                | 80.1                                  | -26.8                                |
|                | 0.91     |                                      | 80.1                                  | -27.2                                |
|                | 0.85     |                                      | 79.7                                  | -27.6                                |
| <b>Ru5</b>     | 0.80     | 8.7                                  | 45.9                                  | -26.0                                |
|                | 0.86     |                                      | 45.9                                  | -26.3                                |
|                | 0.89     |                                      | 45.5                                  | -26.8                                |
